# Supplementary material for: Association between Molecular Initiating Events (MIEs) in Drug-Induced Hiccups
Source: Preprints.org preprint supplement (doi:10.20944/preprints202402.0808.v1), 2024-02-15
Supplement: Supplementary file 1 [file supplementary]

## Sheet: S1
Supplementary Table 1. The suspected drug list and ATC classification
a) ALL Deta table						a) Men's Deta table						a) Women's Deta table
Suspected drugs	ATC_NAME	Number of reports	P-value	ROR		Suspected drugs in male	ATC name	Number of reports	P-value	ROR		Suspected drugs in female	ATC_NAME	Number of reports	P-value	ROR
NICOTINE	Ascorbic acid (vitamin C), plain	185363	<.0001	39.6181		NICOTINE	Ascorbic acid (vitamin C), plain	64381	<.0001	24.5813		ENOXOLONE	Aminoalkyl ethers	1351	<.0001	108.357
	Drugs used in nicotine dependence						Drugs used in nicotine dependence						Anilides
	Other dermatologicals						Other dermatologicals						Antihistamines for topical use
	Preparations with salicylic acid derivatives						Preparations with salicylic acid derivatives						Antiinfectives and antiseptics for local oral treatment
	UNSPECIFIED HERBAL						UNSPECIFIED HERBAL						ANTIPRURITICS, INCL. ANTIHISTAMINES, ANESTHETICS, ETC.
	Vitamin B-complex with vitamin C						Vitamin B-complex with vitamin C						Antiseptics
	Vitamins with minerals						Vitamins with minerals						ANTISPASMODICS AND ANTICHOLINERGICS IN COMBINATION WITH OTHER DRUGS
AZASETRON	Serotonin (5HT3) antagonists	2287	<.0001	29.2619		APREPITANT	Antibiotics	17338	<.0001	19.0268			Carbamide products
CALAMINE	Aminoalkyl ethers	3455	<.0001	28.4903			Other antiemetics						Corticosteroids
	Anesthetics for topical use					CHLORPROMAZINE	HYPNOTICS AND SEDATIVES	24415	<.0001	9.88214			H2-receptor antagonists
	Anticholinergics						Phenothiazines with aliphatic side-chain						HMG CoA reductase inhibitors
	Antihistamines for topical use					PALONOSETRON	Glucocorticoids	18723	<.0001	8.2057			Liver therapy
	Corticosteroids, weak, other combinations						Serotonin (5HT3) antagonists						Local anesthetics
	Other antipruritics					GRANISETRON	Glucocorticoids	31767	<.0001	6.26912			Mucolytics
	OTHER DERMATOLOGICAL PREPARATIONS						Serotonin (5HT3) antagonists						Opium alkaloids and derivatives
	Other emollients and protectives					IRINOTECAN	Combinations of antineoplastic agents	64327	<.0001	6.23623			Other agents for local oral treatment
	Tars						Monoclonal antibodies						Other agents for treatment of hemorrhoids and anal fissures for topical use
	Zinc bandages						Other antineoplastic agents						Other antibiotics for topical use
	Zinc products						Pyrimidine analogues						Other antipruritics
ENOXOLONE	Aminoalkyl ethers	2326	<.0001	25.3731		CORTICOTROPIN	ACTH	10765	<.0001	5.45115			Other cicatrizants
	Anilides					TRICHLORMETHIAZIDE	ACE inhibitors, plain	5968	0.0002	5.38999			OTHER DERMATOLOGICAL PREPARATIONS
	Antihistamines for topical use						Angiotensin II antagonists and diuretics						Other drugs for disorders of the musculo-skeletal system
	Antiinfectives and antiseptics for local oral treatment						Calcium channel blockers and diuretics						Other emollients and protectives
	ANTIPRURITICS, INCL. ANTIHISTAMINES, ANESTHETICS, ETC.						Low-ceiling diuretics and potassium-sparing agents						Other throat preparations
	Antiseptics						Other potassium-sparing agents						Other topical products for joint and muscular pain
	ANTISPASMODICS AND ANTICHOLINERGICS IN COMBINATION WITH OTHER DRUGS						Rauwolfia alkaloids and diuretics in combination						Preparations with salicylic acid derivatives
	Carbamide products						Thiazides, plain						Propionic acid derivatives
	Corticosteroids					FLUOROURACIL	Alpha glucosidase inhibitors	115432	<.0001	5.16429			STOMATOLOGICAL PREPARATIONS
	H2-receptor antagonists						Combinations of antineoplastic agents						Sympathomimetics
	HMG CoA reductase inhibitors						Coxibs						THROAT PREPARATIONS
	Liver therapy						Fenamates					CALAMINE	Aminoalkyl ethers	2290	<.0001	106.65
	Local anesthetics						Other antineoplastic agents						Anesthetics for topical use
	Mucolytics						Other dermatologicals						Anticholinergics
	Opium alkaloids and derivatives						Pyrimidine analogues						Antihistamines for topical use
	Other agents for local oral treatment						Sulfonylureas						Corticosteroids, weak, other combinations
	Other agents for treatment of hemorrhoids and anal fissures for topical use						UNSPECIFIED HERBAL						Other antipruritics
	Other antibiotics for topical use						Vinca alkaloids and analogues						OTHER DERMATOLOGICAL PREPARATIONS
	Other antipruritics						Wart and anti-corn preparations						Other emollients and protectives
	Other cicatrizants					PEMETREXED	Combinations of antineoplastic agents	42226	<.0001	4.98423			Tars
	OTHER DERMATOLOGICAL PREPARATIONS						Folic acid analogues						Zinc bandages
	Other drugs for disorders of the musculo-skeletal system						Platinum compounds						Zinc products
	Other emollients and protectives					CAPECITABINE	Combinations of antineoplastic agents	74068	<.0001	4.94929		NICOTINE	Ascorbic acid (vitamin C), plain	103958	<.0001	85.0375
	Other throat preparations						Monoclonal antibodies						Drugs used in nicotine dependence
	Other topical products for joint and muscular pain						Other antineoplastic agents						Other dermatologicals
	Preparations with salicylic acid derivatives						Platinum compounds						Preparations with salicylic acid derivatives
	Propionic acid derivatives						Protein kinase inhibitors						UNSPECIFIED HERBAL
	STOMATOLOGICAL PREPARATIONS						Pyrimidine analogues						Vitamin B-complex with vitamin C
	Sympathomimetics					HYDROXOCOBALAMIN	Antidotes	7375	0.0002	4.87448			Vitamins with minerals
	THROAT PREPARATIONS						Antiinflammatory/antirheumatic agents in combination with corticosteroids					ETHOSUXIMIDE	Succinimide derivatives	3072	<.0001	34.8167
OTERACIL	ANTIMETABOLITES	5140	<.0001	20.6646			Combinations of antibacterials					FLUCLOXACILLIN	BETA-LACTAM ANTIBACTERIALS, PENICILLINS	11018	<.0001	22.0764
	ANTINEOPLASTIC AGENTS						Combinations of vitamins						Beta-lactamase resistant penicillins
GIMERACIL	ANTIMETABOLITES	5278	<.0001	20.123			Corticosteroids for systemic use, combinations						Combinations of penicillins, incl. beta-lactamase inhibitors
	Platinum compounds						Folic acid and derivatives					CYCLIZINE	Other drugs for functional gastrointestinal disorders	14871	<.0001	17.6637
	Pyrimidine analogues						Iron in combination with folic acid						Other lipid modifying agents
SACCHARIN	Multivitamins with minerals	1776	<.0001	19.9198			Iron in other combinations						Piperazine derivatives
	Other non-therapeutic auxiliary products						Liver therapy					APREPITANT	Antibiotics	28335	<.0001	13.3994
	Urinary concrement solvents						Multivitamins with minerals						Other antiemetics
APREPITANT	Antibiotics	50006	<.0001	18.2368			Other drugs for bile therapy					VINORELBINE	Combinations of antineoplastic agents	36438	<.0001	8.27436
	Other antiemetics						OTHER VITAMIN PRODUCTS, COMBINATIONS						Pyrimidine analogues
ETHOSUXIMIDE	Succinimide derivatives	6595	<.0001	14.9016			Parathyroid hormones and analogues						Vinca alkaloids and analogues
TEGAFUR	Anti-estrogens	8724	<.0001	14.8724			Pyrazolones					QUININE	ACE inhibitors, plain	33532	<.0001	7.24747
	ANTIMETABOLITES						TONICS						Anilides
	Platinum compounds						Vitamin B1 in combination with vitamin B6 and/or vitamin B12						Antispasmodics in combination with other drugs
	Pyrimidine analogues						Vitamin B12 (cyanocobalamin and analogues)						Calcium, combinations with vitamin D and/or other drugs
CHLORPROMAZINE	HYPNOTICS AND SEDATIVES	49677	<.0001	10.3804			VITAMIN B12 AND FOLIC ACID						Combinations of sulfonamides and trimethoprim, incl. derivatives
	Phenothiazines with aliphatic side-chain						Vitamin B-complex, other combinations						Long-acting sulfonamides
ROXITHROMYCIN	Macrolides	6123	0.0002	8.33722			Vitamins with minerals						Methanolquinolines
	Oxicams						Vitamins, other combinations						Opium alkaloids and derivatives
FOSAPREPITANT	Other antiemetics	10963	<.0001	8.24022		GLUCAGON	Glycogenolytic hormones	7536	0.0002	4.77022			OTHER COLD PREPARATIONS
TROPISETRON	Serotonin (5HT3) antagonists	5409	0.0007	7.98498		OXALIPLATIN	Anticholinergics	104006	<.0001	4.73612			Other peripheral vasodilators
IRINOTECAN	Combinations of antineoplastic agents	127865	<.0001	7.5534			Combinations of antineoplastic agents						Preparations inhibiting uric acid production
	Monoclonal antibodies						HMG CoA reductase inhibitors						Propionic acid derivatives
	Other antineoplastic agents						Platinum compounds						Pyrazolones
	Pyrimidine analogues						Pyrimidine analogues						Quinine and derivatives
PALONOSETRON	Glucocorticoids	48455	<.0001	7.22158		LIRAGLUTIDE	Adrenergics in combination with corticosteroids or other drugs, excl. anticholinergics	41711	<.0001	4.68076			Salicylic acid and derivatives
	Serotonin (5HT3) antagonists						Biguanides						Sulfonylureas
GRANISETRON	Glucocorticoids	77083	<.0001	6.481			Dipeptidyl peptidase 4 (DPP-4) inhibitors						UNSPECIFIED HERBAL
	Serotonin (5HT3) antagonists						Glucagon-like peptide-1 (GLP-1) analogues						Xanthines
DELORAZEPAM	Benzodiazepine derivatives	9178	0.0002	6.41672			INSULINS AND ANALOGUES					RUCAPARIB	Other antineoplastic agents	32231	<.0001	6.93565
CEFOPERAZONE	Combinations of antibacterials	10614	<.0001	6.28858			Insulins and analogues for injection, fast-acting					SODIUM	Amino acids/carbohydrates/minerals/vitamins, combinations	42832	<.0001	6.58308
	Combinations of penicillins, incl. beta-lactamase inhibitors						Insulins and analogues for injection, long-acting						AMINOGLYCOSIDE ANTIBACTERIALS
	Penicillins with extended spectrum						Other antidepressants						Antidiarrheal microorganisms
	Third-generation cephalosporins					FOLINIC ACID	Combinations of antineoplastic agents	85939	<.0001	4.6646			Ascorbic acid (vitamin C), combinations
PEMETREXED	Combinations of antineoplastic agents	76100	<.0001	6.15002			Detoxifying agents for antineoplastic treatment						BLOOD SUBSTITUTES AND PERFUSION SOLUTIONS
	Folic acid analogues						Iron in other combinations						Calcium, combinations with vitamin D and/or other drugs
	Platinum compounds						Multivitamins, other combinations						Carbohydrates
DEXMEDETOMIDINE	Other hypnotics and sedatives	13803	<.0001	5.97374			VITAMIN B12 AND FOLIC ACID						Caries prophylactic agents
OXALIPLATIN	Anticholinergics	210345	<.0001	5.87001			Vitamin B-complex, plain						Contact laxatives
	Combinations of antineoplastic agents					LENALIDOMIDE	Glucocorticoids	322094	<.0001	4.61402			Electrolyte solutions
	HMG CoA reductase inhibitors						Heparin group						ELECTROLYTES WITH CARBOHYDRATES
	Platinum compounds						Other antineoplastic agents						Enemas
	Pyrimidine analogues						Other immunosuppressants						Fat/carbohydrates/proteins/minerals/vitamins, combinations
CYCLIZINE	Other drugs for functional gastrointestinal disorders	22119	<.0001	5.85917		IXAZOMIB	Other antineoplastic agents	27237	<.0001	4.24077			Hemodialytics, concentrates
	Other lipid modifying agents					MEGESTROL	Antacids with antiflatulents	30905	<.0001	4.22829			Hypertonic solutions
	Piperazine derivatives						APPETITE STIMULANTS						MINERAL SUPPLEMENTS
FLUOROURACIL	Alpha glucosidase inhibitors	252945	<.0001	5.79112			Benzodiazepine related drugs						Multivitamins with minerals
	Combinations of antineoplastic agents						Other antiallergics						Other antiinflammatory and antirheumatic agents, non-steroids
	Coxibs						Pregnadien derivatives						OTHER BETA-LACTAM ANTIBACTERIALS
	Fenamates						Progestogens						Other combinations of nutrients
	Other antineoplastic agents						Salicylic acid and derivatives						OTHER DRUGS FOR ACID RELATED DISORDERS
	Other dermatologicals					DEXAMETHASONE	Adrenergic and dopaminergic agents	429590	<.0001	4.20541			Other drugs for constipation
	Pyrimidine analogues						Amides						Other emollients and protectives
	Sulfonylureas						Aminoalkyl ethers						Other mineral products
	UNSPECIFIED HERBAL						Aminosalicylic acid and derivatives						OTHER MINERAL SUPPLEMENTS
	Vinca alkaloids and analogues						Anilides						OTHER NUTRIENTS
	Wart and anti-corn preparations						Antacids with antiflatulents						Other topical products for joint and muscular pain
CISPLATIN	Anticholinergics	212507	<.0001	5.47394			Antibiotics						PERITONEAL DIALYTICS
	Combinations of antineoplastic agents						Antibiotics and corticosteroids						Potassium
	Folic acid analogues						Anticholinergics						Sodium
	Monoclonal antibodies						Antiinflammatory/antirheumatic agents in combination with corticosteroids						Soft paraffin and fat products
	Osmotically acting laxatives						Benzodiazepine derivatives						Solutions affecting the electrolyte balance
	Other antineoplastic agents						Beta blocking agents						Solutions for parenteral nutrition
	Platinum compounds						Butylpyrazolidines						UNSPECIFIED HERBAL
	Pyrimidine analogues						Combinations of antineoplastic agents						VITAMIN B-COMPLEX, INCL. COMBINATIONS
	Selective serotonin reuptake inhibitors						Combinations of sulfonamides and trimethoprim, incl. derivatives						Vitamin B-complex, other combinations
	Serotonin (5HT3) antagonists						Combinations of vitamins						Vitamins with minerals
	Solutions producing osmotic diuresis						Corticosteroids					FESOTERODINE	Drugs for urinary frequency and incontinence	20429	0.0008	6.18017
	Taxanes						Corticosteroids and antiinfectives in combination					EXENATIDE	Beta blocking agents, selective	181162	<.0001	5.98978
SELINEXOR	Other antineoplastic agents	18267	<.0001	5.37368			Corticosteroids and mydriatics in combination						Glucagon-like peptide-1 (GLP-1) analogues
TRICHLORMETHIAZIDE	ACE inhibitors, plain	12876	0.0003	5.18313			Corticosteroids for local oral treatment						Insulins and analogues for injection, fast-acting
	Angiotensin II antagonists and diuretics						Corticosteroids for systemic use, combinations					LIRAGLUTIDE	Adrenergics in combination with corticosteroids or other drugs, excl. anticholinergics	74028	<.0001	5.91629
	Calcium channel blockers and diuretics						CORTICOSTEROIDS FOR SYSTEMIC USE, PLAIN						Biguanides
	Low-ceiling diuretics and potassium-sparing agents						CORTICOSTEROIDS, COMBINATIONS WITH ANTISEPTICS						Dipeptidyl peptidase 4 (DPP-4) inhibitors
	Other potassium-sparing agents						Corticosteroids, moderately potent (group II)						Glucagon-like peptide-1 (GLP-1) analogues
	Rauwolfia alkaloids and diuretics in combination						Corticosteroids, moderately potent, combinations with antibiotics						INSULINS AND ANALOGUES
	Thiazides, plain						Corticosteroids, moderately potent, combinations with antiseptics						Insulins and analogues for injection, fast-acting
APOMORPHINE	Antidotes	22763	<.0001	5.00236			Corticosteroids, moderately potent, other combinations						Insulins and analogues for injection, long-acting
	Dopamine agonists						Corticosteroids, plain						Other antidepressants
	Drugs used in erectile dysfunction						Corticosteroids, potent, combinations with antibiotics					CISPLATIN	Anticholinergics	77122	<.0001	4.91901
LENALIDOMIDE	Glucocorticoids	664656	<.0001	4.9577			Corticosteroids, potent, combinations with antiseptics						Combinations of antineoplastic agents
	Heparin group						Corticosteroids, weak, combinations with antiseptics						Folic acid analogues
	Other antineoplastic agents						Corticosteroids,combinations for treatment of acne						Monoclonal antibodies
	Other immunosuppressants						DECONGESTANTS AND OTHER NASAL PREPARATIONS FOR TOPICAL USE						Osmotically acting laxatives
FOLINIC ACID	Combinations of antineoplastic agents	197952	<.0001	4.87574			Drugs used in opioid dependence						Other antineoplastic agents
	Detoxifying agents for antineoplastic treatment						Enemas						Platinum compounds
	Iron in other combinations						Expectorants						Pyrimidine analogues
	Multivitamins, other combinations						First-generation cephalosporins						Selective serotonin reuptake inhibitors
	VITAMIN B12 AND FOLIC ACID						Fluoroquinolones						Serotonin (5HT3) antagonists
	Vitamin B-complex, plain						Glucocorticoids						Solutions producing osmotic diuresis
SUNITINIB	Other antiinflammatory and antirheumatic agents, non-steroids	163120	<.0001	4.75403			H2-receptor antagonists						Taxanes
	Other antineoplastic agents						Hydantoin derivatives					EXEMESTANE	Aromatase inhibitors	84660	<.0001	4.25015
	OTHER ANTINEOPLASTIC AGENTS						Insulins and analogues for injection, long-acting						Monoclonal antibodies
	Protein kinase inhibitors						Iron in other combinations						Other antihistamines for systemic use
DOLASETRON	Serotonin (5HT3) antagonists	14342	0.0006	4.65301			Macrolides						Pregnen (4) derivatives
MEGESTROL	Antacids with antiflatulents	62338	<.0001	4.60094			Monoclonal antibodies						Protein kinase inhibitors
	APPETITE STIMULANTS						MUSCLE RELAXANTS						Retinoids for topical use in acne
	Benzodiazepine related drugs						Nitrogen mustard analogues					CAPECITABINE	Combinations of antineoplastic agents	170916	<.0001	4.16261
	Other antiallergics						Non-selective beta-adrenoreceptor agonists						Monoclonal antibodies
	Pregnadien derivatives						Nucleosides and nucleotides excl. reverse transcriptase inhibitors						Other antineoplastic agents
	Progestogens						Opioid anesthetics						Platinum compounds
	Salicylic acid and derivatives						Other agents for local oral treatment						Protein kinase inhibitors
TRIMEBUTINE	Other agents for treatment of hemorrhoids and anal fissures for topical use	14638	0.0007	4.55887			Other aminoglycosides						Pyrimidine analogues
	Other drugs for functional gastrointestinal disorders						Other antianemic preparations					CHLORPHENAMINE	Anilides	64481	<.0001	4.06941
	Synthetic anticholinergics, esters with tertiary amino group						Other antibacterials						ANTIHISTAMINES FOR SYSTEMIC USE
FLUCLOXACILLIN	BETA-LACTAM ANTIBACTERIALS, PENICILLINS	21639	<.0001	4.53578			Other antidepressants						Barbiturates, combinations
	Beta-lactamase resistant penicillins						Other antiemetics						Combinations of antihistamines
	Combinations of penicillins, incl. beta-lactamase inhibitors						Other antihistamines for systemic use						Corticosteroids for systemic use, combinations
DEXAMETHASONE	Adrenergic and dopaminergic agents	987706	<.0001	4.37264			Other antiinflammatory and antirheumatic agents, non-steroids						COUGH AND COLD PREPARATIONS
	Amides						Other antineoplastic agents						COUGH SUPPRESSANTS, EXCL. COMBINATIONS WITH EXPECTORANTS
	Aminoalkyl ethers						Other combinations of nutrients						Diphenylpropylamine derivatives
	Aminosalicylic acid and derivatives						Other cough suppressants and expectorants						Lincosamides
	Anilides						Other dermatologicals						NASAL DECONGESTANTS FOR SYSTEMIC USE
	Antacids with antiflatulents						Other immunosuppressants						Opium alkaloids and derivatives
	Antibiotics						Other psychostimulants and nootropics						Opium derivatives and expectorants
	Antibiotics and corticosteroids						Other systemic drugs for obstructive airway diseases						OTHER COLD PREPARATIONS
	Anticholinergics						Parasympathomimetics						Other cough suppressants
	Antiinflammatory/antirheumatic agents in combination with corticosteroids						Phenothiazines with piperazine structure						Other cough suppressants and expectorants
	Benzodiazepine derivatives						Podophyllotoxin derivatives						Propionic acid derivatives
	Beta blocking agents						Potassium						Salicylic acid and derivatives
	Butylpyrazolidines						Pyrazolones						Selective beta-2-adrenoreceptor agonists
	Combinations of antineoplastic agents						Quaternary ammonium compounds						Substituted alkylamines
	Combinations of sulfonamides and trimethoprim, incl. derivatives						Serotonin (5HT3) antagonists						Sympathomimetics
	Combinations of vitamins						Tetracyclines						Sympathomimetics,combinations excl corticosteroids
	Corticosteroids						Thiazides, combinations with other drugs						Tetracyclines
	Corticosteroids and antiinfectives in combination						Vinca alkaloids and analogues						Xanthines and adrenergics
	Corticosteroids and mydriatics in combination						Xanthines					NITROFURANTOIN	Antibiotics	99148	<.0001	4.0222
	Corticosteroids for local oral treatment					CISPLATIN	Anticholinergics	107454	<.0001	4.04896			Combinations of antibacterials
	Corticosteroids for systemic use, combinations						Combinations of antineoplastic agents						Nitrofuran derivatives
	CORTICOSTEROIDS FOR SYSTEMIC USE, PLAIN						Folic acid analogues						Other urologicals
	CORTICOSTEROIDS, COMBINATIONS WITH ANTISEPTICS						Monoclonal antibodies						Proton pump inhibitors
	Corticosteroids, moderately potent (group II)						Osmotically acting laxatives						Vitamin B-complex with vitamin C
	Corticosteroids, moderately potent, combinations with antibiotics						Other antineoplastic agents					CALCIUM GLUCONATE	Amino acids/carbohydrates/minerals/vitamins, combinations	91443	<.0001	3.72128
	Corticosteroids, moderately potent, combinations with antiseptics						Platinum compounds						Anilides
	Corticosteroids, moderately potent, other combinations						Pyrimidine analogues						Antiinflammatory preparations, non-steroids for topical use
	Corticosteroids, plain						Selective serotonin reuptake inhibitors						Ascorbic acid (vitamin C), combinations
	Corticosteroids, potent, combinations with antibiotics						Serotonin (5HT3) antagonists						Calcium
	Corticosteroids, potent, combinations with antiseptics						Solutions producing osmotic diuresis						CALCIUM
	Corticosteroids, weak, combinations with antiseptics						Taxanes						Calcium compounds
	Corticosteroids,combinations for treatment of acne					MECOBALAMIN	Antidotes	17347	<.0001	4.03646			Calcium, combinations with vitamin D and/or other drugs
	DECONGESTANTS AND OTHER NASAL PREPARATIONS FOR TOPICAL USE						Combinations of vitamins						Combinations and complexes of aluminium, calcium and magnesium compounds
	Drugs used in opioid dependence						Folic acid and derivatives						Drugs for treatment of hyperkalemia and hyperphosphatemia
	Enemas						IODINE THERAPY						Electrolyte solutions
	Expectorants						Iron in other combinations						ELECTROLYTES WITH CARBOHYDRATES
	First-generation cephalosporins						Multivitamins with minerals						Estren derivatives
	Fluoroquinolones						Multivitamins, other combinations						Folic acid analogues
	Glucocorticoids						Oral rehydration salt formulations						HYPNOTICS AND SEDATIVES
	H2-receptor antagonists						Other analgesics and antipyretics						I.V. SOLUTION ADDITIVES
	Hydantoin derivatives						Other antidepressants						I.V. SOLUTIONS
	Insulins and analogues for injection, long-acting						Other antiepileptics						Iron in other combinations
	Iron in other combinations						Other blood glucose lowering drugs, excl. insulins						Liver therapy
	Macrolides						Other combinations of nutrients						MINERAL SUPPLEMENTS
	Monoclonal antibodies						Other mineral products						Multivitamins with minerals
	MUSCLE RELAXANTS						OTHER NUTRIENTS						Multivitamins, other combinations
	Nitrogen mustard analogues						Other parasympathomimetics						Other combinations of nutrients
	Non-selective beta-adrenoreceptor agonists						Other therapeutic products						Other dermatologicals
	Nucleosides and nucleotides excl. reverse transcriptase inhibitors						Various alimentary tract and metabolism products						Other emollients and protectives
	Opioid anesthetics						Vitamin B1 in combination with vitamin B6 and/or vitamin B12						Other i.v. solution additives
	Other agents for local oral treatment						Vitamin B12 (cyanocobalamin and analogues)						Other mineral products
	Other aminoglycosides						VITAMIN B12 AND FOLIC ACID						Other peripheral vasodilators
	Other antianemic preparations						Vitamin B-complex, other combinations						Other plain vitamin preparations
	Other antibacterials						Vitamin B-complex, plain						Other therapeutic products
	Other antidepressants						Vitamins with minerals						Peroxides
	Other antiemetics						Vitamins, other combinations						Phenothiazines with aliphatic side-chain
	Other antihistamines for systemic use					CITRIC ACID	Acid preparations	12068	0.0001	3.91919			Progestogens
	Other antiinflammatory and antirheumatic agents, non-steroids						Alpha- and beta-adrenoreceptor agonists						Silver compounds
	Other antineoplastic agents						Amino acids/carbohydrates/minerals/vitamins, combinations						Solutions affecting the electrolyte balance
	Other combinations of nutrients						Anilides						Solutions for parenteral nutrition
	Other cough suppressants and expectorants						ANTACIDS						TONICS
	Other dermatologicals						Antacids with antispasmodics						VITAMIN B-COMPLEX, INCL. COMBINATIONS
	Other immunosuppressants						Antacids with sodium bicarbonate						Vitamins with minerals
	Other psychostimulants and nootropics						Antacids, other combinations						Vitamins, other combinations
	Other systemic drugs for obstructive airway diseases						ANTIHEMORRHAGICS					LACTULOSE	AMINOGLYCOSIDE ANTIBACTERIALS	89774	<.0001	3.57332
	Parasympathomimetics						Antihistamines for topical use						Benzodiazepine related drugs
	Phenothiazines with piperazine structure						Antiinfectives and antiseptics for local oral treatment						Contact laxatives
	Podophyllotoxin derivatives						Antiinflammatory preparations, non-steroids for topical use						HMG CoA reductase inhibitors
	Potassium						Ascorbic acid (vitamin C), plain						Low-ceiling diuretics and potassium-sparing agents
	Pyrazolones						Blood transfusion, auxiliary products						Osmotically acting laxatives
	Quaternary ammonium compounds						Bulk-forming laxatives						OTHER BETA-LACTAM ANTIBACTERIALS
	Serotonin (5HT3) antagonists						Calcium						Other drugs for constipation
	Tetracyclines						Calcium compounds						Other lipid modifying agents
	Thiazides, combinations with other drugs						Calcium, combinations with vitamin D and/or other drugs						Proton pump inhibitors
	Vinca alkaloids and analogues						Carbohydrates/proteins/minerals/vitamins, combinations						Sulfonamides, plain
	Xanthines						Caries prophylactic agents						Third-generation cephalosporins
IXAZOMIB	Other antineoplastic agents	58501	<.0001	4.36471			Contact laxatives						UNSPECIFIED HERBAL
VARDENAFIL	Drugs used in erectile dysfunction	19331	0.0002	4.2645			COUGH AND COLD PREPARATIONS					PEGFILGRASTIM	Colony stimulating factors	106005	<.0001	3.39361
HYDROXOCOBALAMIN	Antidotes	19361	0.0002	4.25789			DRUGS AFFECTING BONE STRUCTURE AND MINERALIZATION						Thiazides, plain
	Antiinflammatory/antirheumatic agents in combination with corticosteroids						DRUGS FOR CONSTIPATION					DEXLANSOPRAZOLE	Benzodiazepine derivatives	84069	0.0002	3.35233
	Combinations of antibacterials						Electrolyte solutions						Proton pump inhibitors
	Combinations of vitamins						ELECTROLYTES WITH CARBOHYDRATES					ANASTROZOLE	Anti-estrogens	116988	<.0001	3.24143
	Corticosteroids for systemic use, combinations						EMOLLIENTS AND PROTECTIVES						Aromatase inhibitors
	Folic acid and derivatives						Enemas						Benzodiazepine derivatives
	Iron in combination with folic acid						Enzyme and acid preparations, combinations						Nitrogen mustard analogues
	Iron in other combinations						Expectorants					ARIPIPRAZOLE	Angiotensin II antagonists, plain	199762	<.0001	3.07028
	Liver therapy						Fluoroquinolones						Benzodiazepine derivatives
	Multivitamins with minerals						HMG CoA reductase inhibitors, other combinations						Dopamine agonists
	Other drugs for bile therapy						INFANT FORMULAS						Mucolytics
	OTHER VITAMIN PRODUCTS, COMBINATIONS						Iron bivalent, oral preparations						Other antipsychotics
	Parathyroid hormones and analogues						IRRIGATING SOLUTIONS						Platelet aggregation inhibitors excl. heparin
	Pyrazolones						Magnesium						Pyrimidine analogues
	TONICS						Multivitamins with minerals						Selective serotonin reuptake inhibitors
	Vitamin B1 in combination with vitamin B6 and/or vitamin B12						Multivitamins, other combinations						Thioxanthene derivatives
	Vitamin B12 (cyanocobalamin and analogues)						MULTIVITAMINS, PLAIN					BECLOMETASONE	Adrenergics and other drugs for obstructive airway diseases	85624	0.0007	3.06388
	VITAMIN B12 AND FOLIC ACID						Natural opium alkaloids						Adrenergics in combination with corticosteroids or other drugs, excl. anticholinergics
	Vitamin B-complex, other combinations						Opium alkaloids and derivatives						Corticosteroids
	Vitamins with minerals						Opium derivatives and expectorants						Corticosteroids acting locally
	Vitamins, other combinations						Oral rehydration salt formulations						Corticosteroids, potent (group III)
CAPECITABINE	Combinations of antineoplastic agents	275804	<.0001	4.21571			Osmotically acting laxatives						Glucocorticoids
	Monoclonal antibodies						Other agents for local oral treatment						INTESTINAL ANTIINFLAMMATORY AGENTS
	Other antineoplastic agents						OTHER ALIMENTARY TRACT AND METABOLISM PRODUCTS					LEVETIRACETAM	Carbamates	185067	<.0001	2.57496
	Platinum compounds						Other antiinfectives and antiseptics						H2-receptor antagonists
	Protein kinase inhibitors						Other antiseptics and disinfectants						Other antianemic preparations
	Pyrimidine analogues						Other cicatrizants						Other antiepileptics
MORNIFLUMATE	Antiinflammatory preparations, non-steroids for topical use	19717	0.0003	4.18097			Other combinations of nutrients						Pyrazolones
	Dihydropyridine derivatives						Other cough suppressants and expectorants						Thyroid hormones
	Other antiinflammatory and antirheumatic agents, non-steroids						Other dermatologicals					ONDANSETRON	Aminoalkyl ethers	423434	<.0001	2.09296
	Platelet aggregation inhibitors excl. heparin						OTHER DRUGS FOR ACID RELATED DISORDERS						Glucocorticoids
DRONABINOL	Other antiemetics	37284	<.0001	4.10732			Other drugs for constipation						H2-receptor antagonists
	Other psychostimulants and nootropics						Other emollients and protectives						Non-selective monoamine reuptake inhibitors
SORAFENIB	Protein kinase inhibitors	89181	<.0001	4.00966			Other irrigating solutions						Opioid anesthetics
BORTEZOMIB	Calcium	205712	<.0001	3.96062			Other lipid modifying agents						Osmotically acting laxatives
	Combinations and complexes of aluminium, calcium and magnesium compounds						Other mineral products						Other antiemetics
	Combinations of antineoplastic agents						OTHER MINERAL SUPPLEMENTS						Other general anesthetics
	Folic acid analogues						Other plain vitamin preparations						Other quaternary ammonium compounds
	Glucocorticoids						Other therapeutic products						Propionic acid derivatives
	Nitrogen mustard analogues						Other urologicals						Serotonin (5HT3) antagonists
	Other antineoplastic agents						Phenothiazine derivatives					BISOPROLOL	Benzodiazepine derivatives	255540	0.0007	2.09293
	Other immunosuppressants						Platelet aggregation inhibitors excl. heparin						Beta blocking agents, selective
MOSAPRIDE	Propulsives	21415	0.0005	3.84928			Potassium						Beta blocking agents, selective, and other antihypertensives
CILASTATIN	Aromatase inhibitors	30144	<.0001	3.77681			Propulsives						Beta blocking agents, selective, and thiazides
	Carbapenems						Pyrazolones						Dihydropyridine derivatives
	Other drugs for treatment of tuberculosis						Salicylic acid and derivatives						Glucocorticoids
VINORELBINE	Combinations of antineoplastic agents	54837	<.0001	3.65219			Salt solutions						Vitamin K antagonists
	Pyrimidine analogues						Soft paraffin and fat products					METFORMIN	Adrenergics in combination with corticosteroids or other drugs, excl. anticholinergics	871231	0.0004	1.57659
	Vinca alkaloids and analogues						Solutions affecting the electrolyte balance						Beta blocking agents, selective
MECOBALAMIN	Antidotes	40160	<.0001	3.61723			Solutions for parenteral nutrition						Biguanides
	Combinations of vitamins						STOMATOLOGICAL PREPARATIONS						Carboxamide derivatives
	Folic acid and derivatives						SULFONAMIDES AND TRIMETHOPRIM						Combinations of oral blood glucose lowering drugs
	IODINE THERAPY						Synthetic anticholinergics, quaternary ammonium compounds						Contact laxatives
	Iron in other combinations						UNSPECIFIED HERBAL						Dipeptidyl peptidase 4 (DPP-4) inhibitors
	Multivitamins with minerals						Urinary concrement solvents						Direct factor Xa inhibitors
	Multivitamins, other combinations						Vitamins with minerals						Drugs for urinary frequency and incontinence
	Oral rehydration salt formulations						Vitamins, other combinations						DRUGS USED IN DIABETES
	Other analgesics and antipyretics					APOMORPHINE	Antidotes	13294	<.0001	3.84246			Glucagon-like peptide-1 (GLP-1) analogues
	Other antidepressants						Dopamine agonists						HMG CoA reductase inhibitors
	Other antiepileptics						Drugs used in erectile dysfunction						INSULINS AND ANALOGUES
	Other blood glucose lowering drugs, excl. insulins					OSELTAMIVIR	Neuraminidase inhibitors	23830	<.0001	3.41454			Insulins and analogues for injection, fast-acting
	Other combinations of nutrients					BORTEZOMIB	Calcium	94999	<.0001	3.37439			Multivitamins, plain
	Other mineral products						Combinations and complexes of aluminium, calcium and magnesium compounds						Opioid anesthetics
	OTHER NUTRIENTS						Combinations of antineoplastic agents						Other antidepressants
	Other parasympathomimetics						Folic acid analogues						Other blood glucose lowering drugs, excl. insulins
	Other therapeutic products						Glucocorticoids						Phenylpiperidine derivatives
	Various alimentary tract and metabolism products						Nitrogen mustard analogues						Sulfonamides, plain
	Vitamin B1 in combination with vitamin B6 and/or vitamin B12						Other antineoplastic agents						Sulfonylureas
	Vitamin B12 (cyanocobalamin and analogues)						Other immunosuppressants						Thiazides, plain
	VITAMIN B12 AND FOLIC ACID					SUNITINIB	Other antiinflammatory and antirheumatic agents, non-steroids	97065	<.0001	3.34171			Thiazolidinediones
	Vitamin B-complex, other combinations						Other antineoplastic agents						Thyroid hormones
	Vitamin B-complex, plain						OTHER ANTINEOPLASTIC AGENTS						UNSPECIFIED HERBAL
	Vitamins with minerals						Protein kinase inhibitors					PREDNISONE	3-oxoandrosten (4) derivatives	1269049	<.0001	0.433151
	Vitamins, other combinations					PROCHLORPERAZINE	Amides	84453	<.0001	3.30012			Acetic acid derivatives and related substances
MANNITOL	Acetic acid derivatives and related substances	22953	0.0009	3.59122			Antiarrhythmics, class Ib						Adrenergic and dopaminergic agents
	ACTH						Glucocorticoids						adrenergics in combination anticholinergics
	Actinomycines						Natural opium alkaloids						Adrenergics in combination with corticosteroids or other drugs, excl. anticholinergics
	Antacids with antiflatulents						Other antiemetics						Aminoalkyl ethers
	Antiinflammatory preparations, non-steroids for topical use						Phenothiazine derivatives						Aminoquinolines
	Blood transfusion, auxiliary products						Phenothiazines with piperazine structure						ANALGESICS
	Calcitonin preparations						Propulsives						Anilides
	Carbohydrates						Serotonin (5HT3) antagonists						Anthracyclines and related substances
	Combinations of antineoplastic agents					GEMCITABINE	Anticholinergics	73136	<.0001	3.29105			Anticholinergics
	Drugs used in nicotine dependence						Combinations of antineoplastic agents						Anti-estrogens
	Enzymes						HMG CoA reductase inhibitors						Antiinflammatory/antirheumatic agents in combination with corticosteroids
	H2-receptor antagonists						Osmotically acting laxatives						Beta blocking agents, non-selective
	Interferons						Pyrimidine analogues						Calcineurin inhibitors
	Multivitamins with minerals						Taxanes						Calcium
	MUSCLE RELAXANTS, CENTRALLY ACTING AGENTS					DOPAMINE	Adrenergic and dopaminergic agents	19148	<.0001	3.26039			Carbamic acid esters
	Osmotically acting laxatives						Benzodiazepine derivatives						Combinations of antineoplastic agents
	Other centrally acting agents						Glucocorticoids						Contact laxatives
	Other immunostimulants						Opioid anesthetics						Corticosteroids
	Other immunosuppressants						Pyrazolones						Corticosteroids acting locally
	Other irrigating solutions						Selective serotonin reuptake inhibitors						Corticosteroids and antiinfectives in combination
	Other mineral products					SODIUM PICOSULFATE	Contact laxatives	14671	0.0007	3.22316			CORTICOSTEROIDS FOR SYSTEMIC USE
	Other ophthalmologicals					DRONABINOL	Other antiemetics	17044	0.0003	3.21858			Corticosteroids for systemic use, combinations
	OTHER OPHTHALMOLOGICALS						Other psychostimulants and nootropics						CORTICOSTEROIDS FOR SYSTEMIC USE, COMBINATIONS
	Other respiratory system products					PACLITAXEL	Anticholinergics	70773	<.0001	3.18603			Corticosteroids, plain
	Other therapeutic products						Calcineurin inhibitors						Estrogens
	Parasympathomimetics						Colony stimulating factors						ESTROGENS
	Platinum compounds						Combinations of antineoplastic agents						Fluoroquinolones
	Potassium						Monoclonal antibodies						Folic acid analogues
	Propionic acid derivatives						Other antineoplastic agents						Folic acid and derivatives
	Purine analogues						Other cytotoxic antibiotics						Glucocorticoids
	Solutions affecting the electrolyte balance						Other therapeutic products						H2-receptor antagonists
	Solutions producing osmotic diuresis						PLANT ALKALOIDS AND OTHER NATURAL PRODUCTS						Immunoglobulins, normal human
	Tests for allergic diseases						Platinum compounds						INSULINS AND ANALOGUES
DOPAMINE	Adrenergic and dopaminergic agents	36816	<.0001	3.51895			Podophyllotoxin derivatives						Intermediate-acting sulfonamides
	Benzodiazepine derivatives						Pyrimidine analogues						Natural and semisynthetic estrogens, plain
	Glucocorticoids						Taxanes						Nitrogen mustard analogues
	Opioid anesthetics					DONEPEZIL	Anticholinesterases	51195	<.0001	3.06977			Non-selective monoamine reuptake inhibitors
	Pyrazolones						Thiazolidinediones						Nucleosides and nucleotides excl. reverse transcriptase inhibitors
	Selective serotonin reuptake inhibitors					CLARITHROMYCIN	Anilides	67415	<.0001	3.00648			Opium alkaloids and derivatives
DONEPEZIL	Anticholinesterases	124983	<.0001	3.49038			Antibiotics						Osmotically acting laxatives
	Thiazolidinediones						Combinations for eradication of Helicobacter pylori						Other agents for local oral treatment
GEMCITABINE	Anticholinergics	177341	<.0001	3.30349			Combinations of antibacterials						Other analgesics and antipyretics
	Combinations of antineoplastic agents						Drugs for treatment of lepra						Other antiepileptics
	HMG CoA reductase inhibitors						Glucocorticoids						Other antihistamines for systemic use
	Osmotically acting laxatives						Macrolides						Other antiinflammatory and antirheumatic agents, non-steroids
	Pyrimidine analogues						Preparations increasing uric acid excretion						Other antiinflammatory/antirheumatic agents in combination with other drugs
	Taxanes						Protease inhibitors						Other antineoplastic agents
SODIUM PICOSULFATE	Contact laxatives	34511	0.0002	3.29864			Proton pump inhibitors						Other centrally acting agents
POMALIDOMIDE	Other antineoplastic agents	134002	<.0001	3.25522		BROTIZOLAM	Benzodiazepine derivatives	19527	0.0003	3.00296			Other immunosuppressants
BROTIZOLAM	Benzodiazepine derivatives	40413	<.0001	3.20556			Preparations inhibiting uric acid production						Other opioids
	Preparations inhibiting uric acid production					POMALIDOMIDE	Other antineoplastic agents	65167	<.0001	2.93535			Other urologicals
FESOTERODINE	Drugs for urinary frequency and incontinence	31119	0.0009	3.15336		DOCETAXEL	Bisphosphonates	66766	<.0001	2.92186			Oxicams
DASABUVIR	Antivirals for treatment of HCV infections	48831	<.0001	3.13553			Combinations of antineoplastic agents						Piperazine derivatives
CABOZANTINIB	Protein kinase inhibitors	89600	<.0001	3.11224			Coxibs						Propionic acid derivatives
OMBITASVIR	Antivirals for treatment of HCV infections	51997	<.0001	3.09567			Platinum compounds						Propulsives
	Other antivirals						Taxanes						Proton pump inhibitors
	Protease inhibitors						Vinca alkaloids and analogues						Salicylic acid and derivatives
OSELTAMIVIR	Neuraminidase inhibitors	64700	<.0001	3.09509		METOCLOPRAMIDE	Aminoalkyl ethers	142759	<.0001	2.77765			Selective beta-2-adrenoreceptor agonists
ARIPIPRAZOLE	Angiotensin II antagonists, plain	370762	<.0001	3.0059			Anilides						Selective serotonin reuptake inhibitors
	Benzodiazepine derivatives						Antacids, other combinations						Substituted alkylamines
	Dopamine agonists						ANTIMIGRAINE PREPARATIONS						Sulfonylureas
	Mucolytics						Antipropulsives						Thiazolidinediones
	Other antipsychotics						Antispasmodics in combination with other drugs						Thyroid hormones
	Platelet aggregation inhibitors excl. heparin						Aromatase inhibitors						Vinca alkaloids and analogues
	Pyrimidine analogues						Beta blocking agents, selective						Vitamin D and analogues
	Selective serotonin reuptake inhibitors						Bile acids and derivatives					HYDROXYCHLOROQUINE	Aminoquinolines	594844	<.0001	0.373947
	Thioxanthene derivatives						Charcoal preparations						Butylpyrazolidines
PROCHLORPERAZINE	Amides	226595	<.0001	2.89791			Enzyme preparations						Folic acid analogues
	Antiarrhythmics, class Ib						Lincosamides						Glucocorticoids
	Glucocorticoids						Other antiemetics						H2-receptor antagonists
	Natural opium alkaloids						Other antimigraine preparations						HMG CoA reductase inhibitors
	Other antiemetics						Other drugs for functional gastrointestinal disorders						Imidazoline receptor agonists
	Phenothiazine derivatives						Other general anesthetics						Natural and semisynthetic estrogens, plain
	Phenothiazines with piperazine structure						Other lipid modifying agents						Non-selective monoamine reuptake inhibitors
	Propulsives						Propionic acid derivatives						Opium alkaloids and derivatives
	Serotonin (5HT3) antagonists						Propulsives						Other antiinflammatory and antirheumatic agents, non-steroids
IMIPENEM	Benzodiazepine derivatives	42587	0.0005	2.8573			Proton pump inhibitors						Other potassium-sparing agents
	Carbapenems						Salicylic acid and derivatives						Other specific antirheumatic agents
	Other drugs for treatment of tuberculosis						Solutions affecting the electrolyte balance						Pregnen (4) derivatives
ITRACONAZOLE	Imidazole and triazole derivatives	49572	0.0003	2.77152			Vitamin D and analogues						Propionic acid derivatives
	Imidazole derivatives					SORAFENIB	Protein kinase inhibitors	58769	<.0001	2.73821		METHOTREXATE	Acetic acid derivatives and related substances	1290075	<.0001	0.365989
	Other antiinfectives and antiseptics					CARBOPLATIN	Combinations of antineoplastic agents	101361	<.0001	2.67344			Aminoquinolines
	Triazole derivatives						Folic acid analogues						Anilides
NINTEDANIB	Protein kinase inhibitors	72715	<.0001	2.75371			Monoclonal antibodies						Anthracyclines and related substances
REBAMIPIDE	Other drugs for peptic ulcer and gastro-oesophageal reflux disease (GORD)	55762	0.0002	2.74557			Platinum compounds						ANTIBACTERIALS FOR SYSTEMIC USE
	Other ophthalmologicals						Taxanes						Calcineurin inhibitors
PAZOPANIB	Glucocorticoids	76130	<.0001	2.73338		ITRACONAZOLE	Imidazole and triazole derivatives	23551	0.0008	2.65027			Calcium
	Other antineoplastic agents						Imidazole derivatives						Combinations of antineoplastic agents
	Protein kinase inhibitors						Other antiinfectives and antiseptics						Folic acid analogues
	Serotonin (5HT3) antagonists						Triazole derivatives						Glucocorticoids
MEMANTINE	Other anti-dementia drugs	88737	<.0001	2.61063		ARIPIPRAZOLE	Angiotensin II antagonists, plain	136489	<.0001	2.62595			Gold preparations
CLARITHROMYCIN	Anilides	180608	<.0001	2.54525			Benzodiazepine derivatives						H2-receptor antagonists
	Antibiotics						Dopamine agonists						Natural and semisynthetic estrogens, plain
	Combinations for eradication of Helicobacter pylori						Mucolytics						Natural opium alkaloids
	Combinations of antibacterials						Other antipsychotics						Nitrogen mustard analogues
	Drugs for treatment of lepra						Platelet aggregation inhibitors excl. heparin						Other antiepileptics
	Glucocorticoids						Pyrimidine analogues						Other antiinflammatory and antirheumatic agents, non-steroids
	Macrolides						Selective serotonin reuptake inhibitors						Other antineoplastic agents
	Preparations increasing uric acid excretion						Thioxanthene derivatives						Other immunosuppressants
	Protease inhibitors					REBAMIPIDE	Other drugs for peptic ulcer and gastro-oesophageal reflux disease (GORD)	26323	0.0009	2.51484			Other specific antirheumatic agents
	Proton pump inhibitors						Other ophthalmologicals						Oxicams
LOXOPROFEN	Propionic acid derivatives	72353	0.0003	2.44153		ATROPINE	ANTIARRHYTHMICS, CLASS I AND III	48325	<.0001	2.46683			Prostaglandin analogues
METOCLOPRAMIDE	Aminoalkyl ethers	430871	<.0001	2.40196			Anticholinergics						Purine analogues
	Anilides						Antipropulsives						Selective immunosuppressants
	Antacids, other combinations						ANTISPASMODICS IN COMBINATION WITH PSYCHOLEPTICS						Serotonin (5HT3) antagonists
	ANTIMIGRAINE PREPARATIONS						Belladonna alkaloids, semisynthetic, quaternary ammonium compounds						Thyroid hormones
	Antipropulsives						Belladonna alkaloids, tertiary amines						Tumor necrosis factor alpha (TNF-alpha) inhibitors
	Antispasmodics in combination with other drugs						Belladonna and derivatives in combination with psycholeptics					LEVONORGESTREL	Carboxamide derivatives	478356	<.0001	0.303364
	Aromatase inhibitors						Beta blocking agents						Combinations of sulfonamides and trimethoprim, incl. derivatives
	Beta blocking agents, selective						Ergot alkaloids						CONTRACEPTIVES FOR TOPICAL USE
	Bile acids and derivatives						Fluoroquinolones						Drugs used in nicotine dependence
	Charcoal preparations						Opioids in combination with antispasmodics						Emergency contraceptives
	Enzyme preparations						Other antibacterials						Estren derivatives
	Lincosamides						Other antimigraine preparations						Estrogens
	Other antiemetics						Phenothiazine derivatives						HORMONAL CONTRACEPTIVES FOR SYSTEMIC USE
	Other antimigraine preparations						Synthetic anticholinergics, quaternary ammonium compounds						Intrauterine contraceptives
	Other drugs for functional gastrointestinal disorders					MAGNESIUM OXIDE	Acetic acid derivatives and related substances	116226	<.0001	2.46182			Natural and semisynthetic estrogens, plain
	Other general anesthetics						Amino acids/carbohydrates/minerals/vitamins, combinations						Other antidepressants
	Other lipid modifying agents						Anilides						Other antihistamines for systemic use
	Propionic acid derivatives						Antacids with antiflatulents						Other drugs for treatment of tuberculosis
	Propulsives						Antacids with antispasmodics						Other psychostimulants and nootropics
	Proton pump inhibitors						Antacids, other combinations						Pregnadien derivatives
	Salicylic acid and derivatives						Antispasmodics in combination with other drugs						Progestogens
	Solutions affecting the electrolyte balance						Benzodiazepine derivatives						PROGESTOGENS AND ESTROGENS IN COMBINATION
	Vitamin D and analogues						Beta blocking agents, selective						Progestogens and estrogens, fixed combinations
ATROPINE	ANTIARRHYTHMICS, CLASS I AND III	130221	<.0001	2.38238			Bile acid sequestrants						Progestogens and estrogens, sequential preparations
	Anticholinergics						Bulk-forming laxatives					ETHINYLESTRADIOL	Androgens and estrogens	499673	<.0001	0.290371
	Antipropulsives						Calcium						Antiandrogens and estrogens
	ANTISPASMODICS IN COMBINATION WITH PSYCHOLEPTICS						Calcium, combinations with vitamin D and/or other drugs						Barbiturates and derivatives
	Belladonna alkaloids, semisynthetic, quaternary ammonium compounds						Combinations and complexes of aluminium, calcium and magnesium compounds						Bismuth preparations
	Belladonna alkaloids, tertiary amines						Contact laxatives						Carboxamide derivatives
	Belladonna and derivatives in combination with psycholeptics						Diphenylmethane derivatives						Combinations of sulfonamides and trimethoprim, incl. derivatives
	Beta blocking agents						DRUGS FOR ACID RELATED DISORDERS						Drugs used in nicotine dependence
	Ergot alkaloids						DRUGS FOR CONSTIPATION						Emergency contraceptives
	Fluoroquinolones						DRUGS FOR PEPTIC ULCER AND GASTRO-OESOPHAGEAL REFLUX DISEASE (GORD)						Estrogens
	Opioids in combination with antispasmodics						DRUGS FOR TREATMENT OF BONE DISEASES						Estrogens, combinations with other drugs
	Other antibacterials						Iron in other combinations						Folic acid analogues
	Other antimigraine preparations						Magnesium						Folic acid and derivatives
	Phenothiazine derivatives						Magnesium compounds						HORMONAL CONTRACEPTIVES FOR SYSTEMIC USE
	Synthetic anticholinergics, quaternary ammonium compounds						Multivitamins with minerals						Imidazoline receptor agonists
LACTULOSE	AMINOGLYCOSIDE ANTIBACTERIALS	173591	<.0001	2.37602			Multivitamins, other combinations						Intravaginal contraceptives
	Benzodiazepine related drugs						Multivitamins, plain						Iron bivalent, oral preparations
	Contact laxatives						Natural opium alkaloids						IRON PREPARATIONS
	HMG CoA reductase inhibitors						Osmotically acting laxatives						Natural and semisynthetic estrogens, plain
	Low-ceiling diuretics and potassium-sparing agents						Other agents for local oral treatment						Other anti-acne preparations for systemic use
	Osmotically acting laxatives						Other cardiac combination products						Other antidepressants
	OTHER BETA-LACTAM ANTIBACTERIALS						OTHER COLD PREPARATIONS						Other antihistamines for systemic use
	Other drugs for constipation						Other combinations of nutrients						Other antimigraine preparations
	Other lipid modifying agents						Other drugs for bile therapy						Other centrally acting agents
	Proton pump inhibitors						Other drugs for constipation						Other drugs for treatment of tuberculosis
	Sulfonamides, plain						Other drugs for functional gastrointestinal disorders						Other ophthalmologicals
	Third-generation cephalosporins						Other mineral products						Pregnadien derivatives
	UNSPECIFIED HERBAL						OTHER NUTRIENTS						Progestogens
MAGNESIUM OXIDE	Acetic acid derivatives and related substances	302355	<.0001	2.32736			Other therapeutic products						PROGESTOGENS AND ESTROGENS IN COMBINATION
	Amino acids/carbohydrates/minerals/vitamins, combinations						Platelet aggregation inhibitors excl. heparin						Progestogens and estrogens, fixed combinations
	Anilides						Preparations for biliary tract therapy						Progestogens and estrogens, sequential preparations
	Antacids with antiflatulents						Propionic acid derivatives						Sympathomimetics in glaucoma therapy
	Antacids with antispasmodics						Salicylic acid and derivatives						Vitamins with minerals
	Antacids, other combinations						Selective serotonin (5HT1) agonists					WARFARIN	Alpha and beta blocking agents	469478	<.0001	0.267864
	Antispasmodics in combination with other drugs						Solutions affecting the electrolyte balance						Antiarrhythmics, class III
	Benzodiazepine derivatives						Sulfonamides, plain						Anticholinesterases
	Beta blocking agents, selective						Synthetic anticholinergics, esters with tertiary amino group						ANTITHROMBOTIC AGENTS
	Bile acid sequestrants						UNSPECIFIED HERBAL						Beta blocking agents, selective
	Bulk-forming laxatives						Vitamin A and D in combination						Beta-lactamase resistant penicillins
	Calcium						Vitamin B-complex with vitamin C						Direct factor Xa inhibitors
	Calcium, combinations with vitamin D and/or other drugs						Vitamins with minerals						Direct thrombin inhibitors
	Combinations and complexes of aluminium, calcium and magnesium compounds						Vitamins, other combinations						DRUGS FOR PEPTIC ULCER AND GASTRO-OESOPHAGEAL REFLUX DISEASE (GORD)
	Contact laxatives					EXENATIDE	Beta blocking agents, selective	104897	<.0001	2.36547			Drugs used in erectile dysfunction
	Diphenylmethane derivatives						Glucagon-like peptide-1 (GLP-1) analogues						HMG CoA reductase inhibitors
	DRUGS FOR ACID RELATED DISORDERS						Insulins and analogues for injection, fast-acting						Leukotriene receptor antagonists
	DRUGS FOR CONSTIPATION					MEMANTINE	Other anti-dementia drugs	36917	0.0006	2.30567			Opium alkaloids and derivatives
	DRUGS FOR PEPTIC ULCER AND GASTRO-OESOPHAGEAL REFLUX DISEASE (GORD)					BACLOFEN	Acetic acid derivatives and related substances	131359	<.0001	2.20656			Other antiepileptics
	DRUGS FOR TREATMENT OF BONE DISEASES						Amides						Other antithrombotic agents
	Iron in other combinations						Antiinflammatory preparations, non-steroids for topical use						Other potassium-sparing agents
	Magnesium						Benzodiazepine derivatives						Platelet aggregation inhibitors excl. heparin
	Magnesium compounds						Dopa and dopa derivatives						Proton pump inhibitors
	Multivitamins with minerals						Esters of aminobenzoic acid						Sulfonamides, plain
	Multivitamins, other combinations						Fatty acid derivatives						Testosterone-5-alpha reductase inhibitors
	Multivitamins, plain						Imidazoline receptor agonists						Vitamin K antagonists
	Natural opium alkaloids						Natural and semisynthetic estrogens, plain					LEFLUNOMIDE	Other antiinflammatory and antirheumatic agents, non-steroids	470844	<.0001	0.267083
	Osmotically acting laxatives						Natural opium alkaloids						Other immunosuppressants
	Other agents for local oral treatment						Non-selective monoamine reuptake inhibitors						Selective immunosuppressants
	Other cardiac combination products						OPIOIDS						SPECIFIC ANTIRHEUMATIC AGENTS
	OTHER COLD PREPARATIONS						Opioids in combination with antispasmodics					ETONOGESTREL	HORMONAL CONTRACEPTIVES FOR SYSTEMIC USE	221552	0.0003	0.13115
	Other combinations of nutrients						Other antiepileptics						Intravaginal contraceptives
	Other drugs for bile therapy						Other centrally acting agents						Other centrally acting agents
	Other drugs for constipation						Other general anesthetics						Progestogens
	Other drugs for functional gastrointestinal disorders						Other topical products for joint and muscular pain						Progestogens and estrogens, fixed combinations
	Other mineral products						Oxytocin and analogues					SULFASALAZINE	Aminosalicylic acid and similar agents	343741	<.0001	0.0844452
	OTHER NUTRIENTS						Phenothiazine derivatives						Other antidepressants
	Other therapeutic products						Propionic acid derivatives					ZOPICLONE	Benzodiazepine derivatives	154740	0.0006	0.0626163
	Platelet aggregation inhibitors excl. heparin						Purine derivatives						Benzodiazepine related drugs
	Preparations for biliary tract therapy					ACICLOVIR	Antivirals	181741	<.0001	2.13833			Proton pump inhibitors
	Propionic acid derivatives						CORTICOSTEROIDS, COMBINATIONS WITH ANTIBIOTICS						Selective serotonin reuptake inhibitors
	Salicylic acid and derivatives						Corticosteroids, weak, other combinations					ZINGIBER OFFICINALE	Anilides	267935	<.0001	0.036129
	Selective serotonin (5HT1) agonists						Glucocorticoids						Antacids with sodium bicarbonate
	Solutions affecting the electrolyte balance						Nucleosides and nucleotides excl. reverse transcriptase inhibitors						Antacids, other combinations
	Sulfonamides, plain						Sulfonamides, plain						APPETITE STIMULANTS
	Synthetic anticholinergics, esters with tertiary amino group						Triazole derivatives						Calcium, combinations with vitamin D and/or other drugs
	UNSPECIFIED HERBAL					SENNOSIDE A+B	Contact laxatives	65679	<.0001	2.10299			DRUGS FOR CONSTIPATION
	Vitamin A and D in combination						DRUGS FOR CONSTIPATION						Enzyme and acid preparations, combinations
	Vitamin B-complex with vitamin C						Enemas						Enzyme preparations
	Vitamins with minerals						Osmotically acting laxatives						Multivitamins with minerals
	Vitamins, other combinations						Other drugs for constipation						Other antiinflammatory and antirheumatic agents, non-steroids
CARBOPLATIN	Combinations of antineoplastic agents	301578	<.0001	2.15025			Softeners, emollients						Other antiinflammatory/antirheumatic agents in combination with other drugs
	Folic acid analogues						Thyroid hormones						Other combinations of nutrients
	Monoclonal antibodies						UNSPECIFIED HERBAL						OTHER DERMATOLOGICAL PREPARATIONS
	Platinum compounds						Vitamin D and analogues						Other drugs for constipation
	Taxanes					VALACICLOVIR	Antivirals	85408	0.0002	1.88302			Other lipid modifying agents
ETOPOSIDE	Anthracyclines and related substances	194672	<.0001	2.11844			Nucleosides and nucleotides excl. reverse transcriptase inhibitors						OTHER NUTRIENTS
	Combinations of antineoplastic agents						Other antidepressants						Other therapeutic products
	Corticosteroids						Selective serotonin reuptake inhibitors						Other throat preparations
	Monoclonal antibodies					ONDANSETRON	Aminoalkyl ethers	230629	<.0001	1.86557			UNSPECIFIED HERBAL
	Other antianemic preparations						Glucocorticoids						Vitamins, other combinations
	Other cytotoxic antibiotics						H2-receptor antagonists					ADAPALENE	Antiinfectives for treatment of acne	309308	<.0001	0.0312857
	Podophyllotoxin derivatives						Non-selective monoamine reuptake inhibitors						Retinoids for topical use in acne
	Salicylic acid preparations						Opioid anesthetics
	Taxanes						Osmotically acting laxatives
	UNSPECIFIED HERBAL						Other antiemetics
PRAMIPEXOLE	Aminoalkyl ethers	136651	<.0001	2.09747			Other general anesthetics
	Dopa and dopa derivatives						Other quaternary ammonium compounds
	Dopamine agonists						Propionic acid derivatives
	Other antipsychotics						Serotonin (5HT3) antagonists
	Proton pump inhibitors					FAMOTIDINE	ACE inhibitors, plain	149693	<.0001	1.83401
ACICLOVIR	Antivirals	434541	<.0001	2.07231			Acetic acid derivatives and related substances
	CORTICOSTEROIDS, COMBINATIONS WITH ANTIBIOTICS						Aminoalkyl ethers
	Corticosteroids, weak, other combinations						Aminoquinolines
	Glucocorticoids						ANALGESICS
	Nucleosides and nucleotides excl. reverse transcriptase inhibitors						Anilides
	Sulfonamides, plain						Antiallergic agents, excl. corticosteroids
	Triazole derivatives						Antidepressants in combination with psycholeptics
SENNOSIDE A+B	Contact laxatives	155955	<.0001	2.03936			Antidiarrheal microorganisms
	DRUGS FOR CONSTIPATION						Antidotes
	Enemas						Antihistamines for topical use
	Osmotically acting laxatives						Antiinflammatory preparations, non-steroids for topical use
	Other drugs for constipation						Antiinflammatory products for vaginal administration
	Softeners, emollients						ANTIOBESITY PREPARATIONS, EXCL. DIET PRODUCTS
	Thyroid hormones						Benzodiazepine derivatives
	UNSPECIFIED HERBAL						Butylpyrazolidines
	Vitamin D and analogues						Butyrophenone derivatives
CALCIUM GLUCONATE	Amino acids/carbohydrates/minerals/vitamins, combinations	122693	0.0005	2.0158			Calcium compounds
	Anilides						Carbamic acid esters
	Antiinflammatory preparations, non-steroids for topical use						Combinations for eradication of Helicobacter pylori
	Ascorbic acid (vitamin C), combinations						Corticosteroids
	Calcium						Corticosteroids for local oral treatment
	CALCIUM						Corticosteroids, moderately potent (group II)
	Calcium compounds						Corticosteroids, plain
	Calcium, combinations with vitamin D and/or other drugs						Dihydropyridine derivatives
	Combinations and complexes of aluminium, calcium and magnesium compounds						DRUGS FOR ACID RELATED DISORDERS
	Drugs for treatment of hyperkalemia and hyperphosphatemia						DRUGS FOR PEPTIC ULCER AND GASTRO-OESOPHAGEAL REFLUX DISEASE (GORD)
	Electrolyte solutions						Drugs for treatment of lepra
	ELECTROLYTES WITH CARBOHYDRATES						Folic acid and derivatives
	Estren derivatives						Glucocorticoids
	Folic acid analogues						H2-receptor antagonists
	HYPNOTICS AND SEDATIVES						Heparin group
	I.V. SOLUTION ADDITIVES						Hydantoin derivatives
	I.V. SOLUTIONS						Multivitamins, plain
	Iron in other combinations						Non-selective monoamine reuptake inhibitors
	Liver therapy						Opium alkaloids and derivatives
	MINERAL SUPPLEMENTS						Other antiinflammatory and antirheumatic agents, non-steroids
	Multivitamins with minerals						Other centrally acting agents
	Multivitamins, other combinations						Other general anesthetics
	Other combinations of nutrients						Other immunosuppressants
	Other dermatologicals						Other opioids
	Other emollients and protectives						Oxicams
	Other i.v. solution additives						Platelet aggregation inhibitors excl. heparin
	Other mineral products						Propionic acid derivatives
	Other peripheral vasodilators						Propulsives
	Other plain vitamin preparations						Pyrazolones
	Other therapeutic products						Selective serotonin reuptake inhibitors
	Peroxides						Serotonin (5HT3) antagonists
	Phenothiazines with aliphatic side-chain						Solutions affecting the electrolyte balance
	Progestogens						Sulfonamides, plain
	Silver compounds						Thiazides, plain
	Solutions affecting the electrolyte balance						Vitamin B-complex, plain
	Solutions for parenteral nutrition						Vitamin D and analogues
	TONICS					ZOLEDRONIC ACID	Antiinflammatory agents, non-steroids	132275	<.0001	1.81743
	VITAMIN B-COMPLEX, INCL. COMBINATIONS						Benzodiazepine derivatives
	Vitamins with minerals						Bisphosphonates
	Vitamins, other combinations						Bisphosphonates, combinations
DOCETAXEL	Bisphosphonates	312003	<.0001	1.97718			Coxibs
	Combinations of antineoplastic agents						DRUGS AFFECTING BONE STRUCTURE AND MINERALIZATION
	Coxibs						Monoclonal antibodies
	Platinum compounds						Taxanes
	Taxanes						Vitamin D and analogues
	Vinca alkaloids and analogues					LEVOFLOXACIN	Antiinflammatory agents, non-steroids	171040	0.001	1.53786
ONDANSETRON	Aminoalkyl ethers	694766	<.0001	1.9431			Carboxamide derivatives
	Glucocorticoids						Combinations of antibacterials
	H2-receptor antagonists						Fluoroquinolones
	Non-selective monoamine reuptake inhibitors						Lincosamides
	Opioid anesthetics						Macrolides
	Osmotically acting laxatives						Natural opium alkaloids
	Other antiemetics						Opium alkaloids and derivatives
	Other general anesthetics						Other antiinfectives
	Other quaternary ammonium compounds						Propionic acid derivatives
	Propionic acid derivatives						Tetracyclines
	Serotonin (5HT3) antagonists						Third-generation cephalosporins
BACLOFEN	Acetic acid derivatives and related substances	390690	<.0001	1.90121		LORAZEPAM	Aldehydes and derivatives	258281	<.0001	1.51751
	Amides						Aminoalkyl ethers
	Antiinflammatory preparations, non-steroids for topical use						Anilides
	Benzodiazepine derivatives						Antihistamines for topical use
	Dopa and dopa derivatives						Aromatase inhibitors
	Esters of aminobenzoic acid						Benzodiazepine derivatives
	Fatty acid derivatives						Beta blocking agents, selective
	Imidazoline receptor agonists						Butyrophenone derivatives
	Natural and semisynthetic estrogens, plain						Carbamates
	Natural opium alkaloids						Carboxamide derivatives
	Non-selective monoamine reuptake inhibitors						Combinations of vitamins
	OPIOIDS						Ethers of tropine or tropine derivatives
	Opioids in combination with antispasmodics						Expectorants
	Other antiepileptics						Fatty acid derivatives
	Other centrally acting agents						Fluoroquinolones
	Other general anesthetics						Glucocorticoids
	Other topical products for joint and muscular pain						H2-receptor antagonists
	Oxytocin and analogues						Heparin group
	Phenothiazine derivatives						Hydantoin derivatives
	Propionic acid derivatives						Insulins and analogues for injection, long-acting
	Purine derivatives						Natural opium alkaloids
PACLITAXEL	Anticholinergics	308586	<.0001	1.8714			Nucleoside and nucleotide reverse transcriptase inhibitors
	Calcineurin inhibitors						Other antianemic preparations
	Colony stimulating factors						Other antiemetics
	Combinations of antineoplastic agents						Other antipsychotics
	Monoclonal antibodies						Other drugs for functional gastrointestinal disorders
	Other antineoplastic agents						Other general anesthetics
	Other cytotoxic antibiotics						Other hypnotics and sedatives
	Other therapeutic products						Other opioids
	PLANT ALKALOIDS AND OTHER NATURAL PRODUCTS						Phenothiazine derivatives
	Platinum compounds						Phenylpiperidine derivatives
	Podophyllotoxin derivatives						Propulsives
	Pyrimidine analogues						Selective serotonin reuptake inhibitors
	Taxanes						Serotonin (5HT3) antagonists
FAMOTIDINE	ACE inhibitors, plain	404623	<.0001	1.83561			Synthetic anticholinergics, quaternary ammonium compounds
	Acetic acid derivatives and related substances						Thiazides, combinations with psycholeptics and/or analgesics
	Aminoalkyl ethers						Thyroid hormones
	Aminoquinolines						Vitamin K antagonists
	ANALGESICS					OMEPRAZOLE	Alpha and beta blocking agents	602286	0.0005	1.2928
	Anilides						Alpha-adrenoreceptor antagonists
	Antiallergic agents, excl. corticosteroids						Anilides
	Antidepressants in combination with psycholeptics						Antidiarrheal microorganisms
	Antidiarrheal microorganisms						ANTIEPILEPTICS
	Antidotes						Benzodiazepine derivatives
	Antihistamines for topical use						Benzodiazepine related drugs
	Antiinflammatory preparations, non-steroids for topical use						Benzothiazepine derivatives
	Antiinflammatory products for vaginal administration						Beta blocking agents, selective
	ANTIOBESITY PREPARATIONS, EXCL. DIET PRODUCTS						Combinations and complexes of aluminium, calcium and magnesium compounds
	Benzodiazepine derivatives						Combinations for eradication of Helicobacter pylori
	Butylpyrazolidines						Corticosteroids acting locally
	Butyrophenone derivatives						Dopamine agonists
	Calcium compounds						DRUGS FOR PEPTIC ULCER AND GASTRO-OESOPHAGEAL REFLUX DISEASE (GORD)
	Carbamic acid esters						Drugs for treatment of hyperkalemia and hyperphosphatemia
	Combinations for eradication of Helicobacter pylori						Esters of aminobenzoic acid
	Corticosteroids						Glucocorticoids
	Corticosteroids for local oral treatment						H2-receptor antagonists
	Corticosteroids, moderately potent (group II)						HMG CoA reductase inhibitors
	Corticosteroids, plain						Imidazoline receptor agonists
	Dihydropyridine derivatives						Natural opium alkaloids
	DRUGS FOR ACID RELATED DISORDERS						Nitrofuran derivatives
	DRUGS FOR PEPTIC ULCER AND GASTRO-OESOPHAGEAL REFLUX DISEASE (GORD)						Opium alkaloids and derivatives
	Drugs for treatment of lepra						Other analgesics and antipyretics
	Folic acid and derivatives						Other antianemic preparations
	Glucocorticoids						Other antiepileptics
	H2-receptor antagonists						Other antimigraine preparations
	Heparin group						Other cardiac preparations
	Hydantoin derivatives						Other centrally acting agents
	Multivitamins, plain						Other lipid modifying agents
	Non-selective monoamine reuptake inhibitors						Other ophthalmologicals
	Opium alkaloids and derivatives						Piperazine derivatives
	Other antiinflammatory and antirheumatic agents, non-steroids						Platelet aggregation inhibitors excl. heparin
	Other centrally acting agents						Propionic acid derivatives
	Other general anesthetics						Propulsives
	Other immunosuppressants						Proton pump inhibitors
	Other opioids						Selective estrogen receptor modulators
	Oxicams						Sulfonamides, plain
	Platelet aggregation inhibitors excl. heparin						Synthetic anticholinergics, esters with tertiary amino group
	Propionic acid derivatives						Thyroid hormones
	Propulsives						UNSPECIFIED HERBAL
	Pyrazolones						Vitamin K antagonists
	Selective serotonin reuptake inhibitors					RANITIDINE	Acetic acid derivatives and related substances	378068	0.0005	0.673504
	Serotonin (5HT3) antagonists						Aminoquinolines
	Solutions affecting the electrolyte balance						Anilides
	Sulfonamides, plain						Antiinflammatory preparations, non-steroids for topical use
	Thiazides, plain						Beta blocking agents, selective
	Vitamin B-complex, plain						Carbamic acid esters
	Vitamin D and analogues						CORTICOSTEROIDS FOR SYSTEMIC USE
PEGFILGRASTIM	Colony stimulating factors	180030	0.0005	1.81007			Folic acid analogues
	Thiazides, plain						Folic acid and derivatives
DOXYCYCLINE	Antibiotics	226612	0.0005	1.71531			Glucocorticoids
	Antiinfectives and antiseptics for local oral treatment						H2-receptor antagonists
	Antiinfectives for treatment of acne						Heparin group
	Combinations for eradication of Helicobacter pylori						HMG CoA reductase inhibitors
	Combinations of sulfonamides and trimethoprim, incl. derivatives						Methyldopa
	CORTICOSTEROIDS FOR SYSTEMIC USE						Non-selective monoamine reuptake inhibitors
	H2-receptor antagonists						Opium alkaloids and derivatives
	Natural opium alkaloids						Other analgesics and antipyretics
	Other anti-acne preparations for topical use						Other antidepressants
	Other antibiotics for topical use						Other antiepileptics
	Other antiemetics						Other antiinflammatory and antirheumatic agents, non-steroids
	Other blood products						Other antiinflammatory/antirheumatic agents in combination with other drugs
	Other centrally acting agents						Other centrally acting agents
	Other chemotherapeutics						Other immunosuppressants
	Other mineral products						Other specific antirheumatic agents
	Other therapeutic products						Oxicams
	Protein kinase inhibitors						Propionic acid derivatives
	Tetracycline and derivatives						Selective serotonin reuptake inhibitors
	Tetracyclines						Solutions affecting the electrolyte balance
	Vitamin B-complex, plain						Thiazides, plain
VALACICLOVIR	Antivirals	240709	0.0008	1.68011		WARFARIN	Alpha and beta blocking agents	376789	0.0002	0.645658
	Nucleosides and nucleotides excl. reverse transcriptase inhibitors						Antiarrhythmics, class III
	Other antidepressants						Anticholinesterases
	Selective serotonin reuptake inhibitors						ANTITHROMBOTIC AGENTS
TAMSULOSIN	Alpha-adrenoreceptor antagonists	412182	<.0001	1.66792			Beta blocking agents, selective
	Angiotensin II antagonists, plain						Beta-lactamase resistant penicillins
	Drugs for urinary frequency and incontinence						Direct factor Xa inhibitors
	DRUGS USED IN BENIGN PROSTATIC HYPERTROPHY						Direct thrombin inhibitors
ALLOPURINOL	Benzodiazepine derivatives	578846	<.0001	1.66364			DRUGS FOR PEPTIC ULCER AND GASTRO-OESOPHAGEAL REFLUX DISEASE (GORD)
	Beta blocking agents, selective						Drugs used in erectile dysfunction
	Combinations of sulfonamides and trimethoprim, incl. derivatives						HMG CoA reductase inhibitors
	Fibrates						Leukotriene receptor antagonists
	Glucocorticoids						Opium alkaloids and derivatives
	Gonadotropin releasing hormone analogues						Other antiepileptics
	Other blood glucose lowering drugs, excl. insulins						Other antithrombotic agents
	Other cardiac preparations						Other potassium-sparing agents
	Other non-therapeutic auxiliary products						Platelet aggregation inhibitors excl. heparin
	Platelet aggregation inhibitors excl. heparin						Proton pump inhibitors
	Preparations inhibiting uric acid production						Sulfonamides, plain
	Preparations with no effect on uric acid metabolism						Testosterone-5-alpha reductase inhibitors
	Preparations with salicylic acid derivatives						Vitamin K antagonists
	Proton pump inhibitors					CLOPIDOGREL	Beta blocking agents, selective	358242	0.0002	0.637001
	Salicylic acid and derivatives						Coxibs
	Selective serotonin reuptake inhibitors						Fatty acid derivatives
	Sulfonamides, plain						HMG CoA reductase inhibitors
	Testosterone-5-alpha reductase inhibitors						Insulins and analogues for injection, fast-acting
	Third-generation cephalosporins						Opioid anesthetics
	Vitamin D and analogues						Other lipid modifying agents
OMEPRAZOLE	Alpha and beta blocking agents	1729043	<.0001	1.30341			Phenylpiperidine derivatives
	Alpha-adrenoreceptor antagonists						Platelet aggregation inhibitors excl. heparin
	Anilides						Salicylic acid and derivatives
	Antidiarrheal microorganisms						Selective beta-2-adrenoreceptor agonists
	ANTIEPILEPTICS					RISPERIDONE	Butyrophenone derivatives	239670	0.0005	0.590431
	Benzodiazepine derivatives						Other antidepressants
	Benzodiazepine related drugs						Other antipsychotics
	Benzothiazepine derivatives						Phenothiazines with piperidine structure
	Beta blocking agents, selective						Tertiary amines
	Combinations and complexes of aluminium, calcium and magnesium compounds					SALMETEROL	Adrenergics in combination with corticosteroids or other drugs, excl. anticholinergics	209541	0.0006	0.567331
	Combinations for eradication of Helicobacter pylori						Benzodiazepine derivatives
	Corticosteroids acting locally						Biguanides
	Dopamine agonists						Centrally acting sympathomimetics
	DRUGS FOR PEPTIC ULCER AND GASTRO-OESOPHAGEAL REFLUX DISEASE (GORD)						Corticosteroids
	Drugs for treatment of hyperkalemia and hyperphosphatemia						Dipeptidyl peptidase 4 (DPP-4) inhibitors
	Esters of aminobenzoic acid						Glucagon-like peptide-1 (GLP-1) analogues
	Glucocorticoids						Glucocorticoids
	H2-receptor antagonists						Other antidepressants
	HMG CoA reductase inhibitors						Other antiinflammatory and antirheumatic agents, non-steroids
	Imidazoline receptor agonists						Selective beta-2-adrenoreceptor agonists
	Natural opium alkaloids						Selective serotonin reuptake inhibitors
	Nitrofuran derivatives					BISOPROLOL	Benzodiazepine derivatives	242442	<.0001	0.552464
	Opium alkaloids and derivatives						Beta blocking agents, selective
	Other analgesics and antipyretics						Beta blocking agents, selective, and other antihypertensives
	Other antianemic preparations						Beta blocking agents, selective, and thiazides
	Other antiepileptics						Dihydropyridine derivatives
	Other antimigraine preparations						Glucocorticoids
	Other cardiac preparations						Vitamin K antagonists
	Other centrally acting agents					PREDNISONE	3-oxoandrosten (4) derivatives	632561	<.0001	0.520456
	Other lipid modifying agents						Acetic acid derivatives and related substances
	Other ophthalmologicals						Adrenergic and dopaminergic agents
	Piperazine derivatives						adrenergics in combination anticholinergics
	Platelet aggregation inhibitors excl. heparin						Adrenergics in combination with corticosteroids or other drugs, excl. anticholinergics
	Propionic acid derivatives						Aminoalkyl ethers
	Propulsives						Aminoquinolines
	Proton pump inhibitors						ANALGESICS
	Selective estrogen receptor modulators						Anilides
	Sulfonamides, plain						Anthracyclines and related substances
	Synthetic anticholinergics, esters with tertiary amino group						Anticholinergics
	Thyroid hormones						Anti-estrogens
	UNSPECIFIED HERBAL						Antiinflammatory/antirheumatic agents in combination with corticosteroids
	Vitamin K antagonists						Beta blocking agents, non-selective
ACETYLSALICYLIC ACID	ACE inhibitors and calcium channel blockers	2916425	0.0002	1.2047			Calcineurin inhibitors
	ACE inhibitors, plain						Calcium
	Aminoalkyl ethers						Carbamic acid esters
	Angiotensin II antagonists, plain						Combinations of antineoplastic agents
	Anilides						Contact laxatives
	Anticholinesterases						Corticosteroids
	Antiinflammatory preparations, non-steroids for topical use						Corticosteroids acting locally
	Antiinflammatory products for vaginal administration						Corticosteroids and antiinfectives in combination
	Antiinflammatory/antirheumatic agents in combination with corticosteroids						CORTICOSTEROIDS FOR SYSTEMIC USE
	ANTIMIGRAINE PREPARATIONS						Corticosteroids for systemic use, combinations
	Antispasmodics in combination with other drugs						CORTICOSTEROIDS FOR SYSTEMIC USE, COMBINATIONS
	ANTITHROMBOTIC AGENTS						Corticosteroids, plain
	Barbiturates, combinations						Estrogens
	Barbiturates, plain						ESTROGENS
	Benzomorphan derivatives						Fluoroquinolones
	Beta blocking agents, selective						Folic acid analogues
	Beta blocking agents, selective, and other antihypertensives						Folic acid and derivatives
	Bisphosphonates						Glucocorticoids
	Carbamic acid esters						H2-receptor antagonists
	Centrally acting antiobesity products						Immunoglobulins, normal human
	Combinations and complexes of aluminium, calcium and magnesium compounds						INSULINS AND ANALOGUES
	Combinations of antibacterials						Intermediate-acting sulfonamides
	Corticosteroids, potent, other combinations						Natural and semisynthetic estrogens, plain
	Corticosteroids, very potent (group IV)						Nitrogen mustard analogues
	COUGH AND COLD PREPARATIONS						Non-selective monoamine reuptake inhibitors
	DECONGESTANTS AND OTHER NASAL PREPARATIONS FOR TOPICAL USE						Nucleosides and nucleotides excl. reverse transcriptase inhibitors
	DIET FORMULATIONS FOR TREATMENT OF OBESITY						Opium alkaloids and derivatives
	Digitalis glycosides						Osmotically acting laxatives
	Dihydropyridine derivatives						Other agents for local oral treatment
	Diphenylpropylamine derivatives						Other analgesics and antipyretics
	Dopamine agonists						Other antiepileptics
	Enzymes						Other antihistamines for systemic use
	Ergot alkaloids						Other antiinflammatory and antirheumatic agents, non-steroids
	Ethers, chemically close to antihistamines						Other antiinflammatory/antirheumatic agents in combination with other drugs
	Fatty acid derivatives						Other antineoplastic agents
	Fluoroquinolones						Other centrally acting agents
	Folic acid and derivatives						Other immunosuppressants
	Glucocorticoids						Other opioids
	Halogenated hydrocarbons						Other urologicals
	Heparin group						Oxicams
	HMG CoA reductase inhibitors						Piperazine derivatives
	HMG CoA reductase inhibitors, other combinations						Propionic acid derivatives
	Hydantoin derivatives						Propulsives
	HYPNOTICS AND SEDATIVES						Proton pump inhibitors
	INSULINS AND ANALOGUES						Salicylic acid and derivatives
	Insulins and analogues for injection, intermediate- or long-acting combined with fast-acting						Selective beta-2-adrenoreceptor agonists
	Iron in other combinations						Selective serotonin reuptake inhibitors
	Lincosamides						Substituted alkylamines
	Multivitamins with minerals						Sulfonylureas
	MUSCLE RELAXANTS, CENTRALLY ACTING AGENTS						Thiazolidinediones
	NASAL DECONGESTANTS FOR SYSTEMIC USE						Thyroid hormones
	Natural opium alkaloids						Vinca alkaloids and analogues
	Opium alkaloids and derivatives						Vitamin D and analogues
	Opium derivatives and expectorants					QUETIAPINE	Benzodiazepine related drugs	251423	<.0001	0.487561
	Organic nitrates						Diazepines, oxazepines, thiazepines and oxepines
	Other agents for local oral treatment						Phenothiazines with piperazine structure
	Other analgesics and antipyretics						Propionic acid derivatives
	OTHER ANALGESICS AND ANTIPYRETICS						Selective serotonin reuptake inhibitors
	Other antiepileptics					ETHANOL	Amides	144577	0.0005	0.483009
	Other antihistamines for systemic use						Anesthetics for topical use
	Other antiinflammatory and antirheumatic agents, non-steroids						Anesthetics, local
	Other antimigraine preparations						Anilides
	Other antithrombotic agents						Antibiotics
	Other cardiac stimulants						Antidotes
	OTHER COLD PREPARATIONS						Antihidrotics
	Other drugs for constipation						Antiinfectives
	Other drugs for treatment of tuberculosis						Antiinfectives and antiseptics for local oral treatment
	Other lipid modifying agents						Antipropulsives
	Other potassium-sparing agents						Antiseptics
	Other quaternary ammonium compounds						Barbiturates and derivatives
	Oxazol, thiazine, and triazine derivatives						Barbiturates, plain
	Platelet aggregation inhibitors excl. heparin						Benzodiazepine derivatives
	Preparations inhibiting uric acid production						Biguanides and amidines
	Preparations with salicylic acid derivatives						CARDIAC THERAPY
	Progestogens						Caries prophylactic agents
	Progestogens and estrogens, fixed combinations						Contact laxatives
	Propionic acid derivatives						Enzyme preparations
	Propulsives						Esters of aminobenzoic acid
	Proton pump inhibitors						Expectorants
	Pyrazolones						Hydantoin derivatives
	Salicylic acid and derivatives						Iodine products
	Salicylic acid preparations						Lincosamides
	Softeners, emollients						Medicated dressings with antiinfectives
	Sulfonylureas						Medicated shampoos
	Sympathomimetics						Mucolytics
	Sympathomimetics, plain						Natural opium alkaloids
	Sympathomimetics,combinations excl corticosteroids						Nerve depressants
	Thiazides, combinations with other drugs						Opium alkaloids and derivatives
	Thiazolidinediones						Opium derivatives and expectorants
	Thyroid hormones						Other agents for local oral treatment
	THYROID PREPARATIONS						OTHER ANALGESICS AND ANTIPYRETICS
	Vitamin B-complex with vitamin C						Other anti-acne preparations for topical use
	Vitamin D and analogues						Other antifungals for topical use
	Vitamin K antagonists						Other antiinfectives and antiseptics
	Vitamins, other combinations						Other antiinflammatory and antirheumatic agents, non-steroids
	Xanthine derivatives						Other antiseptics and disinfectants
PARACETAMOL	ACE inhibitors and calcium channel blockers	3543655	<.0001	0.770751			Other combinations of nutrients
	ACE inhibitors, plain						Other cough suppressants and expectorants
	Acetic acid derivatives and related substances						Other emollients and protectives
	Adamantane derivatives						Other hypnotics and sedatives
	Adrenergic and dopaminergic agents						Other non-therapeutic auxiliary products
	adrenergics in combination anticholinergics						OTHER OTOLOGICALS
	Aldehydes and derivatives						Other therapeutic products
	Aldosterone antagonists						Other topical products for joint and muscular pain
	Alpha-adrenoreceptor antagonists						Peroxides
	Aminoalkyl ethers						Phenol and derivatives
	Aminoquinolines						Preparations containing sulfur
	Amphenicols						Pyrazolones
	ANALGESICS						Quaternary ammonium compounds
	Anilides						Salicylic acid and derivatives
	Antacids with sodium bicarbonate						Salicylic acid preparations
	Antiallergic agents, excl. corticosteroids						Scilla glycosides
	Antiarrhythmics, class III						Sclerosing agents for local injection
	Antibiotics						Soft paraffin and fat products
	Anticholinesterases						STOMATOLOGICAL PREPARATIONS
	ANTIDEPRESSANTS						Substituted alkylamines
	Antidepressants in combination with psycholeptics						Sympathomimetics
	ANTIHISTAMINES FOR SYSTEMIC USE						Tars
	ANTIINFLAMMATORY AND ANTIRHEUMATIC PRODUCTS, NON-STEROIDS						TONICS
	Antiinflammatory preparations, non-steroids for topical use						UNSPECIFIED HERBAL
	ANTIMIGRAINE PREPARATIONS						Vitamins, other combinations
	Antiseptics						Wart and anti-corn preparations
	Antispasmodics in combination with other drugs					PREGABALIN	Acetic acid derivatives and related substances	262337	<.0001	0.481605
	Antispasmodics, psycholeptics and analgesics in combination						ANTIEPILEPTICS
	Aromatase inhibitors						ANTIHISTAMINES FOR SYSTEMIC USE
	Barbiturates and derivatives						Antiinflammatory preparations, non-steroids for topical use
	Belladonna alkaloids, tertiary amines						Beta blocking agents, selective
	Belladonna and derivatives in combination with analgesics						Glucocorticoids
	Benzodiazepine derivatives						H2-receptor antagonists
	Benzodiazepine related drugs						Iron in combination with folic acid
	Benzomorphan derivatives						Other analgesics and antipyretics
	Benzothiazepine derivatives						Other antiepileptics
	Beta blocking agents, selective						Proton pump inhibitors
	Beta-lactamase inhibitors					DICLOFENAC	Acetic acid derivatives and related substances	161911	0.0002	0.477859
	Bisphosphonates						Amides
	Butylpyrazolidines						Amino acids, incl. combinations with polypeptides
	Butyrophenone derivatives						Aminoquinolines
	Calcium						Antiinflammatory agents, non-steroids
	Carbamates						Antiinflammatory preparations, non-steroids for topical use
	Carbamic acid esters						Benzothiazepine derivatives
	Centrally acting sympathomimetics						Bile acid sequestrants
	Combinations and complexes of aluminium, calcium and magnesium compounds						Carbamic acid esters
	Combinations of antihistamines						Coxibs
	Contact laxatives						Diphenylpropylamine derivatives
	Corticosteroids and antiinfectives in combination						Esters of aminobenzoic acid
	Corticosteroids, weak, combinations with antibiotics						Folic acid analogues
	COUGH AND COLD PREPARATIONS						Glucocorticoids
	COUGH SUPPRESSANTS AND EXPECTORANTS, COMBINATIONS						H2-receptor antagonists
	COUGH SUPPRESSANTS, EXCL. COMBINATIONS WITH EXPECTORANTS						HMG CoA reductase inhibitors
	Coxibs						Natural opium alkaloids
	Dihydropyridine derivatives						Non-selective monoamine reuptake inhibitors
	Diphenylmethane derivatives						Opium alkaloids and derivatives
	Diphenylpropylamine derivatives						Other antiepileptics
	DRUGS FOR FUNCTIONAL GASTROINTESTINAL DISORDERS						Other antiinflammatory and antirheumatic agents, non-steroids
	DRUGS FOR PEPTIC ULCER AND GASTRO-OESOPHAGEAL REFLUX DISEASE (GORD)						Other antiinflammatory/antirheumatic agents in combination with other drugs
	Drugs used in alcohol dependence						Other centrally acting agents
	Drugs used in erectile dysfunction						Other dermatologicals
	Drugs used in opioid dependence						Other general anesthetics
	Enzymes						Other immunosuppressants
	Ergot alkaloids						Other topical products for joint and muscular pain
	Ethers, chemically close to antihistamines						Oxazol, thiazine, and triazine derivatives
	Expectorants						Propionic acid derivatives
	EXPECTORANTS, EXCL. COMBINATIONS WITH COUGH SUPPRESSANTS						Proton pump inhibitors
	Fatty acid derivatives						Purine derivatives
	Fenamates						Soft paraffin and fat products
	First-generation cephalosporins						Thiazides, plain
	Fluoroquinolones					NAPROXEN	ACE inhibitors and calcium channel blockers	172795	<.0001	0.469553
	Folic acid analogues						ACE inhibitors and diuretics
	Fourth-generation cephalosporins						Amides
	Glucocorticoids						Aminoalkyl ethers
	H2-receptor antagonists						Aminoquinolines
	HMG CoA reductase inhibitors						Anilides
	Hypnotics and sedatives in combination, excl. barbiturates						ANTIINFLAMMATORY AND ANTIRHEUMATIC PRODUCTS, NON-STEROIDS
	Imidazole and triazole derivatives						Antiinflammatory preparations, non-steroids for topical use
	Imidazoline receptor agonists						Antiinflammatory products for vaginal administration
	Insulins and analogues for injection, fast-acting						Benzodiazepine derivatives
	Iron bivalent, oral preparations						Carbamic acid esters
	Lincosamides						Corticosteroids
	Macrolides						Corticosteroids for local oral treatment
	Melatonin receptor agonists						Corticosteroids, moderately potent (group II)
	Mucolytics						Corticosteroids, plain
	Multivitamins, other combinations						Coxibs
	Multivitamins, plain						Dihydropyridine derivatives
	MUSCLE RELAXANTS, CENTRALLY ACTING AGENTS						Ethers, chemically close to antihistamines
	NASAL DECONGESTANTS FOR SYSTEMIC USE						Fibrates
	Natural opium alkaloids						Folic acid and derivatives
	Non-selective monoamine reuptake inhibitors						Glucocorticoids
	Nucleosides and nucleotides excl. reverse transcriptase inhibitors						H2-receptor antagonists
	Opioid anesthetics						Natural and semisynthetic estrogens, plain
	OPIOIDS						Non-selective monoamine reuptake inhibitors
	Opioids in combination with antispasmodics						Opium alkaloids and derivatives
	Opioids in combination with non-opioid analgesics						Other antiepileptics
	Opium alkaloids and derivatives						Other antiinflammatory and antirheumatic agents, non-steroids
	Opium derivatives and expectorants						Other drugs for functional gastrointestinal disorders
	Organic nitrates						Other opioids
	Other agents for local oral treatment						Pregnen (4) derivatives
	Other agents for treatment of hemorrhoids and anal fissures for topical use						Propionic acid derivatives
	Other analgesics and antipyretics						Propulsives
	OTHER ANALGESICS AND ANTIPYRETICS						Proton pump inhibitors
	Other antianemic preparations						Retinoids for treatment of psoriasis
	Other antidepressants						Salicylic acid and derivatives
	Other antihistamines for systemic use						Selective serotonin (5HT1) agonists
	Other antiinflammatory and antirheumatic agents, non-steroids					RIVAROXABAN	Biguanides	207679	<.0001	0.463236
	Other antiinflammatory/antirheumatic agents in combination with other drugs						Direct factor Xa inhibitors
	Other antimigraine preparations						HMG CoA reductase inhibitors
	Other antiseptics and disinfectants						Prostaglandin analogues
	Other centrally acting agents						Vitamin K antagonists
	OTHER COLD PREPARATIONS					ESCITALOPRAM	Antidepressants in combination with psycholeptics	151254	0.0002	0.461641
	Other cough suppressants						Benzodiazepine derivatives
	Other drugs for functional gastrointestinal disorders						Magnesium
	Other drugs for peptic ulcer and gastro-oesophageal reflux disease (GORD)						Selective serotonin reuptake inhibitors
	Other drugs for treatment of tuberculosis					MYCOPHENOLIC ACID	Selective immunosuppressants	210602	<.0001	0.456787
	Other general anesthetics					AMIODARONE	Antiarrhythmics, class III	160636	<.0001	0.434617
	Other hypnotics and sedatives						Benzodiazepine derivatives
	Other nasal preparations						Beta blocking agents, selective
	Other opioids						CARDIAC THERAPY
	Other quaternary ammonium compounds						Other antimigraine preparations
	Oxazol, thiazine, and triazine derivatives						Propulsives
	Oxicams						Rauwolfia alkaloids
	Penicillins with extended spectrum						Vitamin K antagonists
	Phenothiazine derivatives					METHYLPHENIDATE	Anilides	101410	0.0009	0.428149
	Phenothiazines with piperazine structure						Centrally acting sympathomimetics
	Phenylpiperidine derivatives						Lithium
	Piperazine derivatives					FLUOXETINE	Adrenergic and dopaminergic agents	133327	<.0001	0.410488
	Platelet aggregation inhibitors excl. heparin						Aminoquinolines
	Potassium						Anilides
	Propionic acid derivatives						Antidepressants in combination with psycholeptics
	Propulsives						Butylpyrazolidines
	Proton pump inhibitors						Glucocorticoids
	Pyrazolones						H2-receptor antagonists
	Salicylic acid and derivatives						Natural opium alkaloids
	Selective beta-2-adrenoreceptor agonists						Nucleosides and nucleotides excl. reverse transcriptase inhibitors
	Selective immunosuppressants						Opium alkaloids and derivatives
	Selective serotonin reuptake inhibitors						Other antidepressants
	Softeners, emollients						Other antiepileptics
	Substituted alkylamines						Other antiinflammatory and antirheumatic agents, non-steroids
	Sulfonamides, plain						Other opioids
	Sympathomimetics						Oxicams
	Sympathomimetics, plain						Selective serotonin reuptake inhibitors
	Sympathomimetics,combinations excl corticosteroids						Sulfonamides, plain
	Synthetic anticholinergic agents in combination with analgesics						Trimethoprim and derivatives
	Synthetic anticholinergics, esters with tertiary amino group					TIOTROPIUM	adrenergics in combination anticholinergics	198012	<.0001	0.409602
	Tetracyclines						Adrenergics in combination with corticosteroids or other drugs, excl. anticholinergics
	Thiazides, plain						Anticholinergics
	Thyroid hormones						Other systemic drugs for obstructive airway diseases
	Vitamin B12 (cyanocobalamin and analogues)						Xanthines
	Vitamin D and analogues					TACROLIMUS	Agents for dermatitis, excluding corticosteroids	208212	<.0001	0.389478
	Vitamin K antagonists						Calcineurin inhibitors
RANITIDINE	Acetic acid derivatives and related substances	1007019	0.0009	0.719676			Corticosteroids, potent (group III)
	Aminoquinolines						Glucocorticoids
	Anilides						Monoclonal antibodies
	Antiinflammatory preparations, non-steroids for topical use						Other therapeutic products
	Beta blocking agents, selective						Selective immunosuppressants
	Carbamic acid esters					RIBAVIRIN	Antivirals for treatment of HCV infections	207774	<.0001	0.372126
	CORTICOSTEROIDS FOR SYSTEMIC USE						Immunoglobulins, normal human
	Folic acid analogues						Interferons
	Folic acid and derivatives						Nucleosides and nucleotides excl. reverse transcriptase inhibitors
	Glucocorticoids						Other antidepressants
	H2-receptor antagonists						Other antivirals
	Heparin group						Other urologicals
	HMG CoA reductase inhibitors						Protease inhibitors
	Methyldopa					CLONIDINE	ACE inhibitors, plain	96974	0.0003	0.369846
	Non-selective monoamine reuptake inhibitors						Aldosterone antagonists
	Opium alkaloids and derivatives						Amides
	Other analgesics and antipyretics						Aminoquinolines
	Other antidepressants						ANALGESICS
	Other antiepileptics						ANESTHETICS, GENERAL
	Other antiinflammatory and antirheumatic agents, non-steroids						Beta blocking agents, selective
	Other antiinflammatory/antirheumatic agents in combination with other drugs						Dihydropyridine derivatives
	Other centrally acting agents						Imidazoline receptor agonists
	Other immunosuppressants						Imidazoline receptor agonists in combination with diuretics
	Other specific antirheumatic agents						Natural opium alkaloids
	Oxicams						OPIOIDS
	Propionic acid derivatives						Other antidepressants
	Selective serotonin reuptake inhibitors						Other antiepileptics
	Solutions affecting the electrolyte balance						Other antiinflammatory and antirheumatic agents, non-steroids
	Thiazides, plain						Other antimigraine preparations
LEVOTHYROXINE	Adrenergics in combination with corticosteroids or other drugs, excl. anticholinergics	2038694	<.0001	0.669341			Other centrally acting agents
	Angiotensin II antagonists and diuretics						Other general anesthetics
	Biguanides						Other plain vitamin preparations
	Corticosteroids						Phenylpiperidine derivatives
	Iodine therapy						Progestogens and estrogens, fixed combinations
	Leukotriene receptor antagonists						Sympathomimetics in glaucoma therapy
	Natural and semisynthetic estrogens, plain					CICLOSPORIN	ACE inhibitors and diuretics	155702	<.0001	0.351382
	Non-selective monoamine reuptake inhibitors						Calcineurin inhibitors
	Organic nitrates						Calcium, combinations with vitamin D and/or other drugs
	Other antidepressants						Combinations of antineoplastic agents
	OTHER DERMATOLOGICAL PREPARATIONS						Combinations of sulfonamides and trimethoprim, incl. derivatives
	OTHER NUTRIENTS						Dihydropyridine derivatives
	Preparations with no effect on uric acid metabolism						Folic acid analogues
	Proton pump inhibitors						Other immunosuppressants
	Salicylic acid and derivatives						Other ophthalmologicals
	Selective serotonin reuptake inhibitors						Protein kinase inhibitors
	Synthetic estrogens, plain						Selective immunosuppressants
	Thyroid hormones						Taxanes
BUDESONIDE	adrenergics in combination anticholinergics	687501	0.0006	0.655419		METHOTREXATE	Acetic acid derivatives and related substances	420926	<.0001	0.344256
	Adrenergics in combination with corticosteroids or other drugs, excl. anticholinergics						Aminoquinolines
	Antiallergic agents, excl. corticosteroids						Anilides
	Anticholinergics						Anthracyclines and related substances
	Biguanides						ANTIBACTERIALS FOR SYSTEMIC USE
	Corticosteroids						Calcineurin inhibitors
	Corticosteroids acting locally						Calcium
	Corticosteroids, potent (group III)						Combinations of antineoplastic agents
	Corticosteroids, weak (group I)						Folic acid analogues
	Dipeptidyl peptidase 4 (DPP-4) inhibitors						Glucocorticoids
	Glucagon-like peptide-1 (GLP-1) analogues						Gold preparations
	Glucocorticoids						H2-receptor antagonists
	Mucolytics						Natural and semisynthetic estrogens, plain
	Other aminoglycosides						Natural opium alkaloids
	Other antibiotics for topical use						Nitrogen mustard analogues
	Other antidepressants						Other antiepileptics
	Phenylalkylamine derivatives						Other antiinflammatory and antirheumatic agents, non-steroids
	Preparations inhibiting uric acid production						Other antineoplastic agents
	Proton pump inhibitors						Other immunosuppressants
	Selective beta-2-adrenoreceptor agonists						Other specific antirheumatic agents
	Thyroid hormones						Oxicams
WARFARIN	Alpha and beta blocking agents	893032	<.0001	0.635929			Prostaglandin analogues
	Antiarrhythmics, class III						Purine analogues
	Anticholinesterases						Selective immunosuppressants
	ANTITHROMBOTIC AGENTS						Serotonin (5HT3) antagonists
	Beta blocking agents, selective						Thyroid hormones
	Beta-lactamase resistant penicillins						Tumor necrosis factor alpha (TNF-alpha) inhibitors
	Direct factor Xa inhibitors					CLOZAPINE	Benzodiazepine derivatives	171367	<.0001	0.341221
	Direct thrombin inhibitors						Diazepines, oxazepines, thiazepines and oxepines
	DRUGS FOR PEPTIC ULCER AND GASTRO-OESOPHAGEAL REFLUX DISEASE (GORD)						TONICS
	Drugs used in erectile dysfunction					TOFACITINIB	Selective immunosuppressants	83108	0.0004	0.340726
	HMG CoA reductase inhibitors					ROSIGLITAZONE	Combinations of oral blood glucose lowering drugs	128638	<.0001	0.337388
	Leukotriene receptor antagonists						Iron bivalent, oral preparations
	Opium alkaloids and derivatives						Other blood glucose lowering drugs, excl. insulins
	Other antiepileptics						Salicylic acid and derivatives
	Other antithrombotic agents						Sulfonylureas
	Other potassium-sparing agents						Thiazolidinediones
	Platelet aggregation inhibitors excl. heparin					VENLAFAXINE	Adrenergics in combination with corticosteroids or other drugs, excl. anticholinergics	152183	<.0001	0.309899
	Proton pump inhibitors						Biguanides
	Sulfonamides, plain						Dipeptidyl peptidase 4 (DPP-4) inhibitors
	Testosterone-5-alpha reductase inhibitors						Glucagon-like peptide-1 (GLP-1) analogues
	Vitamin K antagonists						Other antidepressants
SALMETEROL	Adrenergics in combination with corticosteroids or other drugs, excl. anticholinergics	647302	0.0004	0.635591			Phenothiazines with aliphatic side-chain
	Benzodiazepine derivatives						Selective serotonin reuptake inhibitors
	Biguanides						Thyroid hormones
	Centrally acting sympathomimetics						Xanthine derivatives
	Corticosteroids					TENOFOVIR	Antivirals for treatment of HIV infections, combinations	240643	<.0001	0.30546
	Dipeptidyl peptidase 4 (DPP-4) inhibitors						Nucleoside and nucleotide reverse transcriptase inhibitors
	Glucagon-like peptide-1 (GLP-1) analogues						Other antivirals
	Glucocorticoids					TELAPREVIR	Antivirals for treatment of HCV infections	71461	0.0003	0.290602
	Other antidepressants						Interferons
	Other antiinflammatory and antirheumatic agents, non-steroids					BUPRENORPHINE	Drugs used in opioid dependence	136571	<.0001	0.234818
	Selective beta-2-adrenoreceptor agonists						Oripavine derivatives
	Selective serotonin reuptake inhibitors						OTHER ANALGESICS AND ANTIPYRETICS
DULOXETINE	Aminoalkyl ethers	744028	0.0001	0.626563			Other centrally acting agents
	Benzodiazepine related drugs						Tetracyclines
	Other analgesics and antipyretics					EMTRICITABINE	Antivirals for treatment of HIV infections, combinations	201741	<.0001	0.233603
	Other antidepressants						Nucleoside and nucleotide reverse transcriptase inhibitors
	Other urologicals					EVEROLIMUS	Anti-estrogens	72804	<.0001	0.233359
	Phenothiazine derivatives						Aromatase inhibitors
	Sympathomimetics						Monoclonal antibodies
TIOTROPIUM	adrenergics in combination anticholinergics	528919	0.0004	0.600124			Other immunosuppressants
	Adrenergics in combination with corticosteroids or other drugs, excl. anticholinergics						Prolactine inhibitors
	Anticholinergics						Protein kinase inhibitors
	Other systemic drugs for obstructive airway diseases						Selective immunosuppressants
	Xanthines					AMBRISENTAN	Antihypertensives for pulmonary arterial hypertension	73216	<.0001	0.232045
QUETIAPINE	Benzodiazepine related drugs	673580	<.0001	0.587404			Phosphodiesterase inhibitors
	Diazepines, oxazepines, thiazepines and oxepines					PALIPERIDONE	Other antipsychotics	62735	0.0001	0.21065
	Phenothiazines with piperazine structure					APREMILAST	Other antipsoriatics for systemic use	83146	<.0001	0.204302
	Propionic acid derivatives					AZATHIOPRINE	Aminosalicylic acid and similar agents	102540	<.0001	0.20243
	Selective serotonin reuptake inhibitors						Beta blocking agents, selective
CELECOXIB	ACE inhibitors and diuretics	522298	0.0002	0.577693			Calcineurin inhibitors
	Acetic acid derivatives and related substances						Combinations of antineoplastic agents
	Anticholinesterases						Other immunosuppressants
	Bisphosphonates						Selective immunosuppressants
	Coxibs						Vitamin D and analogues
	HMG CoA reductase inhibitors					SULFASALAZINE	Aminosalicylic acid and similar agents	74735	<.0001	0.176795
	Hydantoin derivatives						Other antidepressants
	OTHER ANALGESICS AND ANTIPYRETICS					LEFLUNOMIDE	Other antiinflammatory and antirheumatic agents, non-steroids	80722	<.0001	0.163668
	Other antidepressants						Other immunosuppressants
	Other antihistamines for systemic use						Selective immunosuppressants
	Other antineoplastic agents						SPECIFIC ANTIRHEUMATIC AGENTS
	Other drugs for functional gastrointestinal disorders					LEUPRORELIN	Direct thrombin inhibitors	132288	<.0001	0.156841
	Other topical products for joint and muscular pain						Gonadotropin releasing hormone analogues
	Propionic acid derivatives						Non-nucleoside reverse transcriptase inhibitors
	Pyrimidine analogues					ENZALUTAMIDE	Anti-androgens	143014	<.0001	0.145056
	Selective beta-2-adrenoreceptor agonists					ABIRATERONE	Other hormone antagonists and related agents	65244	<.0001	0.144663
	Taxanes					ZIDOVUDINE	Antivirals for treatment of HIV infections, combinations	43331	0.0003	0.130724
CETIRIZINE	Aminoalkyl ethers	660167	<.0001	0.575595			Benzodiazepine derivatives
	Antiallergic agents, excl. corticosteroids						Combinations of antibacterials
	Combinations of antihistamines						Combinations of sulfonamides and trimethoprim, incl. derivatives
	Mucolytics						Nucleoside and nucleotide reverse transcriptase inhibitors
	Piperazine derivatives						Nucleosides and nucleotides excl. reverse transcriptase inhibitors
	Proton pump inhibitors					ROFECOXIB	Anilides	130505	<.0001	0.130073
	Sympathomimetics						Coxibs
ETHANOL	Amides	469622	0.0002	0.559085			Expectorants
	Anesthetics for topical use						Interferons
	Anesthetics, local						Other antiinflammatory/antirheumatic agents in combination with other drugs
	Anilides						Other antineoplastic agents
	Antibiotics						Platelet aggregation inhibitors excl. heparin
	Antidotes						Propionic acid derivatives
	Antihidrotics					TREPROSTINIL	Other vasodilators used in cardiac diseases	75572	<.0001	0.124874
	Antiinfectives						Platelet aggregation inhibitors excl. heparin
	Antiinfectives and antiseptics for local oral treatment					EFAVIRENZ	Antivirals for treatment of HIV infections, combinations	93998	<.0001	0.100369
	Antipropulsives						Non-nucleoside reverse transcriptase inhibitors
	Antiseptics						Other antivirals
	Barbiturates and derivatives					LISDEXAMFETAMINE	Centrally acting sympathomimetics	29183	0.0009	0.0647076
	Barbiturates, plain					ZIPRASIDONE	Indole derivatives	31837	0.0004	0.0593113
	Benzodiazepine derivatives					MERCAPTOPURINE	Combinations of antineoplastic agents	33625	0.0003	0.056156
	Biguanides and amidines						Purine analogues
	CARDIAC THERAPY					ISOTRETINOIN	Antiinfectives for treatment of acne	58642	<.0001	0.0321883
	Caries prophylactic agents						HORMONAL CONTRACEPTIVES FOR SYSTEMIC USE
	Contact laxatives						Other emollients and protectives
	Enzyme preparations						Retinoids for topical use in acne
	Esters of aminobenzoic acid						Retinoids for treatment of acne
	Expectorants					ADAPALENE	Antiinfectives for treatment of acne	77899	<.0001	0.0242246
	Hydantoin derivatives						Retinoids for topical use in acne
	Iodine products
	Lincosamides
	Medicated dressings with antiinfectives
	Medicated shampoos
	Mucolytics
	Natural opium alkaloids
	Nerve depressants
	Opium alkaloids and derivatives
	Opium derivatives and expectorants
	Other agents for local oral treatment
	OTHER ANALGESICS AND ANTIPYRETICS
	Other anti-acne preparations for topical use
	Other antifungals for topical use
	Other antiinfectives and antiseptics
	Other antiinflammatory and antirheumatic agents, non-steroids
	Other antiseptics and disinfectants
	Other combinations of nutrients
	Other cough suppressants and expectorants
	Other emollients and protectives
	Other hypnotics and sedatives
	Other non-therapeutic auxiliary products
	OTHER OTOLOGICALS
	Other therapeutic products
	Other topical products for joint and muscular pain
	Peroxides
	Phenol and derivatives
	Preparations containing sulfur
	Pyrazolones
	Quaternary ammonium compounds
	Salicylic acid and derivatives
	Salicylic acid preparations
	Scilla glycosides
	Sclerosing agents for local injection
	Soft paraffin and fat products
	STOMATOLOGICAL PREPARATIONS
	Substituted alkylamines
	Sympathomimetics
	Tars
	TONICS
	UNSPECIFIED HERBAL
	Vitamins, other combinations
	Wart and anti-corn preparations
NAPROXEN	ACE inhibitors and calcium channel blockers	653241	<.0001	0.557685
	ACE inhibitors and diuretics
	Amides
	Aminoalkyl ethers
	Aminoquinolines
	Anilides
	ANTIINFLAMMATORY AND ANTIRHEUMATIC PRODUCTS, NON-STEROIDS
	Antiinflammatory preparations, non-steroids for topical use
	Antiinflammatory products for vaginal administration
	Benzodiazepine derivatives
	Carbamic acid esters
	Corticosteroids
	Corticosteroids for local oral treatment
	Corticosteroids, moderately potent (group II)
	Corticosteroids, plain
	Coxibs
	Dihydropyridine derivatives
	Ethers, chemically close to antihistamines
	Fibrates
	Folic acid and derivatives
	Glucocorticoids
	H2-receptor antagonists
	Natural and semisynthetic estrogens, plain
	Non-selective monoamine reuptake inhibitors
	Opium alkaloids and derivatives
	Other antiepileptics
	Other antiinflammatory and antirheumatic agents, non-steroids
	Other drugs for functional gastrointestinal disorders
	Other opioids
	Pregnen (4) derivatives
	Propionic acid derivatives
	Propulsives
	Proton pump inhibitors
	Retinoids for treatment of psoriasis
	Salicylic acid and derivatives
	Selective serotonin (5HT1) agonists
RIVAROXABAN	Biguanides	473037	0.0001	0.53845
	Direct factor Xa inhibitors
	HMG CoA reductase inhibitors
	Prostaglandin analogues
	Vitamin K antagonists
MYCOPHENOLIC ACID	Selective immunosuppressants	473363	0.0001	0.538078
RIBAVIRIN	Antivirals for treatment of HCV infections	418398	0.0002	0.533901
	Immunoglobulins, normal human
	Interferons
	Nucleosides and nucleotides excl. reverse transcriptase inhibitors
	Other antidepressants
	Other antivirals
	Other urologicals
	Protease inhibitors
MONTELUKAST	Leukotriene receptor antagonists	614535	<.0001	0.529064
	Non-selective beta-adrenoreceptor agonists
TACROLIMUS	Agents for dermatitis, excluding corticosteroids	426261	0.0001	0.524032
	Calcineurin inhibitors
	Corticosteroids, potent (group III)
	Glucocorticoids
	Monoclonal antibodies
	Other therapeutic products
	Selective immunosuppressants
IPRATROPIUM	adrenergics in combination anticholinergics	369375	0.0003	0.519925
	Adrenergics in combination with corticosteroids or other drugs, excl. anticholinergics
	Aminoalkyl ethers
	Anticholinergics
	Calcium
	Corticosteroids
	Corticosteroids, potent (group III)
	Glucocorticoids
	Mucolytics
	Other antiepileptics
	Other nasal preparations
	Selective beta-2-adrenoreceptor agonists
PREGABALIN	Acetic acid derivatives and related substances	904530	<.0001	0.514975
	ANTIEPILEPTICS
	ANTIHISTAMINES FOR SYSTEMIC USE
	Antiinflammatory preparations, non-steroids for topical use
	Beta blocking agents, selective
	Glucocorticoids
	H2-receptor antagonists
	Iron in combination with folic acid
	Other analgesics and antipyretics
	Other antiepileptics
	Proton pump inhibitors
FLUOXETINE	Adrenergic and dopaminergic agents	502722	<.0001	0.475368
	Aminoquinolines
	Anilides
	Antidepressants in combination with psycholeptics
	Butylpyrazolidines
	Glucocorticoids
	H2-receptor antagonists
	Natural opium alkaloids
	Nucleosides and nucleotides excl. reverse transcriptase inhibitors
	Opium alkaloids and derivatives
	Other antidepressants
	Other antiepileptics
	Other antiinflammatory and antirheumatic agents, non-steroids
	Other opioids
	Oxicams
	Selective serotonin reuptake inhibitors
	Sulfonamides, plain
	Trimethoprim and derivatives
PREDNISONE	3-oxoandrosten (4) derivatives	2105560	<.0001	0.450173
	Acetic acid derivatives and related substances
	Adrenergic and dopaminergic agents
	adrenergics in combination anticholinergics
	Adrenergics in combination with corticosteroids or other drugs, excl. anticholinergics
	Aminoalkyl ethers
	Aminoquinolines
	ANALGESICS
	Anilides
	Anthracyclines and related substances
	Anticholinergics
	Anti-estrogens
	Antiinflammatory/antirheumatic agents in combination with corticosteroids
	Beta blocking agents, non-selective
	Calcineurin inhibitors
	Calcium
	Carbamic acid esters
	Combinations of antineoplastic agents
	Contact laxatives
	Corticosteroids
	Corticosteroids acting locally
	Corticosteroids and antiinfectives in combination
	CORTICOSTEROIDS FOR SYSTEMIC USE
	Corticosteroids for systemic use, combinations
	CORTICOSTEROIDS FOR SYSTEMIC USE, COMBINATIONS
	Corticosteroids, plain
	Estrogens
	ESTROGENS
	Fluoroquinolones
	Folic acid analogues
	Folic acid and derivatives
	Glucocorticoids
	H2-receptor antagonists
	Immunoglobulins, normal human
	INSULINS AND ANALOGUES
	Intermediate-acting sulfonamides
	Natural and semisynthetic estrogens, plain
	Nitrogen mustard analogues
	Non-selective monoamine reuptake inhibitors
	Nucleosides and nucleotides excl. reverse transcriptase inhibitors
	Opium alkaloids and derivatives
	Osmotically acting laxatives
	Other agents for local oral treatment
	Other analgesics and antipyretics
	Other antiepileptics
	Other antihistamines for systemic use
	Other antiinflammatory and antirheumatic agents, non-steroids
	Other antiinflammatory/antirheumatic agents in combination with other drugs
	Other antineoplastic agents
	Other centrally acting agents
	Other immunosuppressants
	Other opioids
	Other urologicals
	Oxicams
	Piperazine derivatives
	Propionic acid derivatives
	Propulsives
	Proton pump inhibitors
	Salicylic acid and derivatives
	Selective beta-2-adrenoreceptor agonists
	Selective serotonin reuptake inhibitors
	Substituted alkylamines
	Sulfonylureas
	Thiazolidinediones
	Thyroid hormones
	Vinca alkaloids and analogues
	Vitamin D and analogues
TENOFOVIR	Antivirals for treatment of HIV infections, combinations	378714	<.0001	0.424222
	Nucleoside and nucleotide reverse transcriptase inhibitors
	Other antivirals
CORTISONE	3-oxoandrosten (4) derivatives	200958	0.0007	0.409678
	Amides
	CORTICOSTEROIDS FOR SYSTEMIC USE
	CORTICOSTEROIDS, DERMATOLOGICAL PREPARATIONS
	Corticosteroids, plain
	Corticosteroids, weak (group I)
	Enzymes
	Glucocorticoids
	Imidazole derivatives
	Natural and semisynthetic estrogens, plain
	Opioid anesthetics
	Other agents for local oral treatment
	Other antifungals for topical use
	Other antiinflammatory and antirheumatic agents, non-steroids
	Other immunosuppressants
	Oxicams
	Pregnen (4) derivatives
	Sulfonylureas
ESCITALOPRAM	Antidepressants in combination with psycholeptics	531906	<.0001	0.404987
	Benzodiazepine derivatives
	Magnesium
	Selective serotonin reuptake inhibitors
VENLAFAXINE	Adrenergics in combination with corticosteroids or other drugs, excl. anticholinergics	582678	<.0001	0.383061
	Biguanides
	Dipeptidyl peptidase 4 (DPP-4) inhibitors
	Glucagon-like peptide-1 (GLP-1) analogues
	Other antidepressants
	Phenothiazines with aliphatic side-chain
	Selective serotonin reuptake inhibitors
	Thyroid hormones
	Xanthine derivatives
LETROZOLE	Anti-estrogens	199480	0.0003	0.373394
	Aromatase inhibitors
	OTHER ANTINEOPLASTIC AGENTS
	Retinoids for topical use in acne
	Selective immunosuppressants
	Vitamin B-complex, plain
DICLOFENAC	Acetic acid derivatives and related substances	653062	<.0001	0.353659
	Amides
	Amino acids, incl. combinations with polypeptides
	Aminoquinolines
	Antiinflammatory agents, non-steroids
	Antiinflammatory preparations, non-steroids for topical use
	Benzothiazepine derivatives
	Bile acid sequestrants
	Carbamic acid esters
	Coxibs
	Diphenylpropylamine derivatives
	Esters of aminobenzoic acid
	Folic acid analogues
	Glucocorticoids
	H2-receptor antagonists
	HMG CoA reductase inhibitors
	Natural opium alkaloids
	Non-selective monoamine reuptake inhibitors
	Opium alkaloids and derivatives
	Other antiepileptics
	Other antiinflammatory and antirheumatic agents, non-steroids
	Other antiinflammatory/antirheumatic agents in combination with other drugs
	Other centrally acting agents
	Other dermatologicals
	Other general anesthetics
	Other immunosuppressants
	Other topical products for joint and muscular pain
	Oxazol, thiazine, and triazine derivatives
	Propionic acid derivatives
	Proton pump inhibitors
	Purine derivatives
	Soft paraffin and fat products
	Thiazides, plain
EMTRICITABINE	Antivirals for treatment of HIV infections, combinations	310812	<.0001	0.340416
	Nucleoside and nucleotide reverse transcriptase inhibitors
AZATHIOPRINE	Aminosalicylic acid and similar agents	335352	<.0001	0.338848
	Beta blocking agents, selective
	Calcineurin inhibitors
	Combinations of antineoplastic agents
	Other immunosuppressants
	Selective immunosuppressants
	Vitamin D and analogues
ESTRADIOL	3-oxoandrosten (4) derivatives	383616	<.0001	0.337021
	Androgen, progestogen and estrogen in combination
	Androgens and estrogens
	Antiandrogens and estrogens
	Beta blocking agents
	Calcium
	Corticosteroids, potent (group III)
	Drugs for urinary frequency and incontinence
	Estrogens
	Estrogens, combinations with other drugs
	Glucocorticoids
	HORMONAL CONTRACEPTIVES FOR SYSTEMIC USE
	Multivitamins, plain
	Natural and semisynthetic estrogens, plain
	Other antiepileptics
	OTHER DERMATOLOGICAL PREPARATIONS
	Other dermatologicals
	Other drugs for treatment of tuberculosis
	Other emollients and protectives
	Other psychostimulants and nootropics
	Pregnadien derivatives
	Pregnen (4) derivatives
	Progestogens
	PROGESTOGENS AND ESTROGENS IN COMBINATION
	Progestogens and estrogens, fixed combinations
	Progestogens and estrogens, sequential preparations
	Proton pump inhibitors
	Selective serotonin reuptake inhibitors
	SEX HORMONES AND MODULATORS OF THE GENITAL SYSTEM
	Thiazides, plain
	Thyroid hormones
CICLOSPORIN	ACE inhibitors and diuretics	435119	<.0001	0.333087
	Calcineurin inhibitors
	Calcium, combinations with vitamin D and/or other drugs
	Combinations of antineoplastic agents
	Combinations of sulfonamides and trimethoprim, incl. derivatives
	Dihydropyridine derivatives
	Folic acid analogues
	Other immunosuppressants
	Other ophthalmologicals
	Protein kinase inhibitors
	Selective immunosuppressants
	Taxanes
MEDROXYPROGESTERONE	3-oxoandrosten (4) derivatives	156084	0.0007	0.32654
	Aminoquinolines
	Calcitonin preparations
	ESTROGENS
	Natural and semisynthetic estrogens, plain
	Non-selective monoamine reuptake inhibitors
	Other antiinflammatory and antirheumatic agents, non-steroids
	Pregnen (4) derivatives
	Progestogens
	PROGESTOGENS AND ESTROGENS IN COMBINATION
	Progestogens and estrogens, fixed combinations
	Progestogens and estrogens, sequential preparations
RISEDRONIC ACID	Bisphosphonates	205401	<.0001	0.324435
	Bisphosphonates, combinations
APREMILAST	Other antipsoriatics for systemic use	281922	<.0001	0.319719
MACITENTAN	Antihypertensives for pulmonary arterial hypertension	234279	<.0001	0.317876
LEUPRORELIN	Direct thrombin inhibitors	211142	<.0001	0.315604
	Gonadotropin releasing hormone analogues
	Non-nucleoside reverse transcriptase inhibitors
ENZALUTAMIDE	Anti-androgens	146243	0.0004	0.294898
SALICYLIC ACID	Anesthetics for topical use	199993	<.0001	0.294002
	Anilides
	ANTI-ACNE PREPARATIONS FOR TOPICAL USE
	ANTIFUNGALS FOR TOPICAL USE
	Antihidrotics
	Antiinfectives and antiseptics for local oral treatment
	Antiinflammatory agents, non-steroids
	ANTIPSORIATICS FOR TOPICAL USE
	ANTISEPTICS AND DISINFECTANTS
	Antracen derivatives
	Carbamide products
	Corticosteroids
	Corticosteroids acting locally
	Corticosteroids and antiinfectives in combination
	Corticosteroids for local oral treatment
	Corticosteroids, moderately potent (group II)
	Corticosteroids, moderately potent, combinations with antibiotics
	Corticosteroids, moderately potent, other combinations
	CORTICOSTEROIDS, OTHER COMBINATIONS
	Corticosteroids, plain
	CORTICOSTEROIDS, PLAIN
	Corticosteroids, potent (group III)
	Corticosteroids, potent, combinations with antiseptics
	Corticosteroids, potent, other combinations
	Corticosteroids, very potent, other combinations
	Corticosteroids, weak (group I)
	Corticosteroids, weak, other combinations
	Glucocorticoids
	Imidazole derivatives
	Medicated dressings with antiinfectives
	Medicated shampoos
	Opium alkaloids and derivatives
	Osmotically acting laxatives
	Other agents for local oral treatment
	Other analgesics and antipyretics
	Other anti-acne preparations for systemic use
	Other anti-acne preparations for topical use
	Other antifungals for topical use
	Other antiinfectives
	Other antiinflammatory and antirheumatic agents, non-steroids
	Other antiinflammatory/antirheumatic agents in combination with other drugs
	Other antipsoriatics for topical use
	Other antiseptics and disinfectants
	Other centrally acting agents
	Other dermatologicals
	Other emollients and protectives
	Other nasal preparations
	Other therapeutic products
	Other topical products for joint and muscular pain
	Peroxides
	Phenol and derivatives
	Platelet aggregation inhibitors excl. heparin
	Podophyllotoxin derivatives
	Preparations containing sulfur
	PREPARATIONS FOR TREATMENT OF WOUNDS AND ULCERS
	Preparations with salicylic acid derivatives
	Salicylic acid and derivatives
	Salicylic acid preparations
	Tars
	Wart and anti-corn preparations
ALENDRONIC ACID	Bisphosphonates	721042	<.0001	0.287612
	Bisphosphonates, combinations
TREPROSTINIL	Other vasodilators used in cardiac diseases	322966	<.0001	0.279031
	Platelet aggregation inhibitors excl. heparin
METHOTREXATE	Acetic acid derivatives and related substances	1888276	<.0001	0.27859
	Aminoquinolines
	Anilides
	Anthracyclines and related substances
	ANTIBACTERIALS FOR SYSTEMIC USE
	Calcineurin inhibitors
	Calcium
	Combinations of antineoplastic agents
	Folic acid analogues
	Glucocorticoids
	Gold preparations
	H2-receptor antagonists
	Natural and semisynthetic estrogens, plain
	Natural opium alkaloids
	Nitrogen mustard analogues
	Other antiepileptics
	Other antiinflammatory and antirheumatic agents, non-steroids
	Other antineoplastic agents
	Other immunosuppressants
	Other specific antirheumatic agents
	Oxicams
	Prostaglandin analogues
	Purine analogues
	Selective immunosuppressants
	Serotonin (5HT3) antagonists
	Thyroid hormones
	Tumor necrosis factor alpha (TNF-alpha) inhibitors
HYDROXYCHLOROQUINE	Aminoquinolines	780070	<.0001	0.265771
	Butylpyrazolidines
	Folic acid analogues
	Glucocorticoids
	H2-receptor antagonists
	HMG CoA reductase inhibitors
	Imidazoline receptor agonists
	Natural and semisynthetic estrogens, plain
	Non-selective monoamine reuptake inhibitors
	Opium alkaloids and derivatives
	Other antiinflammatory and antirheumatic agents, non-steroids
	Other potassium-sparing agents
	Other specific antirheumatic agents
	Pregnen (4) derivatives
	Propionic acid derivatives
AMBRISENTAN	Antihypertensives for pulmonary arterial hypertension	321051	<.0001	0.256279
	Phosphodiesterase inhibitors
CAFFEINE	Acetic acid derivatives and related substances	332244	<.0001	0.247632
	Acidifiers
	Adrenergics and other drugs for obstructive airway diseases
	Alpha- and beta-adrenoreceptor agonists
	Aminoalkyl ethers
	Anilides
	Antacids with sodium bicarbonate
	ANTIEPILEPTICS
	ANTIHISTAMINES FOR SYSTEMIC USE
	ANTIINFLAMMATORY AND ANTIRHEUMATIC PRODUCTS, NON-STEROIDS
	Antiinflammatory preparations, non-steroids for topical use
	Antiinflammatory products for vaginal administration
	ANTIMIGRAINE PREPARATIONS
	ANTIOBESITY PREPARATIONS, EXCL. DIET PRODUCTS
	Antiseptics
	Antispasmodics, psycholeptics and analgesics in combination
	Barbiturates and derivatives
	Barbiturates, combinations
	Barbiturates, plain
	Belladonna and derivatives in combination with psycholeptics
	Benzodiazepine derivatives
	Benzodiazepine related drugs
	Bisphosphonates
	Carbamates
	Carbamic acid esters
	Carbohydrates/proteins/minerals/vitamins, combinations
	Centrally acting sympathomimetics
	Combinations of antihistamines
	Combinations of sulfonamides and trimethoprim, incl. derivatives
	Corticosteroids, plain
	COUGH AND COLD PREPARATIONS
	COUGH SUPPRESSANTS AND EXPECTORANTS, COMBINATIONS
	DIET FORMULATIONS FOR TREATMENT OF OBESITY
	Diphenylpropylamine derivatives
	Dopamine agonists
	Drugs used in nicotine dependence
	Enemas
	Enzymes
	Ergot alkaloids
	Esters of aminobenzoic acid
	Ethers, chemically close to antihistamines
	First-generation cephalosporins
	Fluoroquinolones
	H2-receptor antagonists
	Heparin group
	Hydantoin derivatives
	HYPNOTICS AND SEDATIVES
	Hypnotics and sedatives in combination, excl. barbiturates
	Lincosamides
	Macrolides
	Medicated shampoos
	Mucolytics
	Multivitamins, other combinations
	NASAL DECONGESTANTS FOR SYSTEMIC USE
	Natural opium alkaloids
	OPIOIDS
	Opioids in combination with antispasmodics
	Opioids in combination with non-opioid analgesics
	Opium alkaloids and derivatives
	Opium derivatives and expectorants
	Organic nitrates
	Other agents for treatment of hemorrhoids and anal fissures for topical use
	Other analgesics and antipyretics
	OTHER ANALGESICS AND ANTIPYRETICS
	Other antidepressants
	Other antiemetics
	Other antihistamines for systemic use
	Other antimigraine preparations
	Other antispasmodics in combination with analgesics
	Other cardiac stimulants
	OTHER COLD PREPARATIONS
	Other combinations of nutrients
	Other cough suppressants
	Other dermatologicals
	OTHER DIURETICS
	Other drugs for disorders of the musculo-skeletal system
	Other drugs for treatment of tuberculosis
	Other general anesthetics
	Other hypnotics and sedatives
	Other nervous system drugs
	OTHER NUTRIENTS
	Other psychostimulants and nootropics
	Other therapeutic products
	Oxazol, thiazine, and triazine derivatives
	Papaverine and derivatives
	Penicillins with extended spectrum
	Phenothiazine derivatives
	Phenothiazines with piperazine structure
	Piperazine derivatives
	Platelet aggregation inhibitors excl. heparin
	Preparations with salicylic acid derivatives
	Progestogens and estrogens, fixed combinations
	Propionic acid derivatives
	Protease inhibitors
	PSYCHOSTIMULANTS, AGENTS USED FOR ADHD AND NOOTROPICS
	Pyrazolones
	Respiratory stimulants
	Salicylic acid and derivatives
	Substituted alkylamines
	Sympathomimetics
	Sympathomimetics,combinations excl corticosteroids
	Tests for gastric secretion
	Tetracyclines
	TONICS
	UNSPECIFIED HERBAL
	Vitamin B-complex, other combinations
	Vitamin B-complex, plain
	Vitamins with minerals
	Vitamins, other combinations
	Xanthine derivatives
	Xanthines
	Xanthines and adrenergics
SUMATRIPTAN	Ergot alkaloids	177725	<.0001	0.242622
	HMG CoA reductase inhibitors
	Natural opium alkaloids
	Other analgesics and antipyretics
	Other antiepileptics
	Other centrally acting agents
	Other drugs affecting bone structure and mineralization
	Proton pump inhibitors
	Selective serotonin (5HT1) agonists
TOFACITINIB	Selective immunosuppressants	608990	<.0001	0.237785
ESTROGENS CONJUGATED	3-oxoandrosten (4) derivatives	258947	<.0001	0.196726
	Adrenergic and dopaminergic agents
	Aminoquinolines
	Androgens and estrogens
	Androstan derivatives
	ANTIANDROGENS
	Benzothiazepine derivatives
	Calcitonin preparations
	Carboxamide derivatives
	Contact laxatives
	Digitalis glycosides
	Electrolyte solutions
	Estrogens
	Estrogens, combinations with other drugs
	Fibrates
	Folic acid analogues
	Glucocorticoids
	Multivitamins, plain
	Natural and semisynthetic estrogens, plain
	Other antidepressants
	Other antiinflammatory and antirheumatic agents, non-steroids
	Other centrally acting agents
	Other opioids
	Piperazine derivatives
	Potassium
	Pregnen (4) derivatives
	PROGESTOGENS AND ESTROGENS IN COMBINATION
	Progestogens and estrogens, fixed combinations
	Progestogens and estrogens, sequential preparations
	Propionic acid derivatives
	Selective serotonin reuptake inhibitors
	Softeners, emollients
	Thiazides, plain
	Thyroid hormones
EFAVIRENZ	Antivirals for treatment of HIV infections, combinations	146874	<.0001	0.186839
	Non-nucleoside reverse transcriptase inhibitors
	Other antivirals
NORETHISTERONE	Amino acids	111080	0.0002	0.176484
	Anti-estrogens
	Benzimidazole derivatives
	Bismuth preparations
	Calcium
	Estren derivatives
	HORMONAL CONTRACEPTIVES FOR SYSTEMIC USE
	Imidazole and triazole derivatives
	IRON PREPARATIONS
	Natural and semisynthetic estrogens, plain
	Other drugs for treatment of tuberculosis
	Pregnen (4) derivatives
	Progestogens
	Progestogens and estrogens, fixed combinations
	Progestogens and estrogens, sequential preparations
ROFECOXIB	Anilides	301917	<.0001	0.168691
	Coxibs
	Expectorants
	Interferons
	Other antiinflammatory/antirheumatic agents in combination with other drugs
	Other antineoplastic agents
	Platelet aggregation inhibitors excl. heparin
	Propionic acid derivatives
ETHINYLESTRADIOL	Androgens and estrogens	521015	<.0001	0.157765
	Antiandrogens and estrogens
	Barbiturates and derivatives
	Bismuth preparations
	Carboxamide derivatives
	Combinations of sulfonamides and trimethoprim, incl. derivatives
	Drugs used in nicotine dependence
	Emergency contraceptives
	Estrogens
	Estrogens, combinations with other drugs
	Folic acid analogues
	Folic acid and derivatives
	HORMONAL CONTRACEPTIVES FOR SYSTEMIC USE
	Imidazoline receptor agonists
	Intravaginal contraceptives
	Iron bivalent, oral preparations
	IRON PREPARATIONS
	Natural and semisynthetic estrogens, plain
	Other anti-acne preparations for systemic use
	Other antidepressants
	Other antihistamines for systemic use
	Other antimigraine preparations
	Other centrally acting agents
	Other drugs for treatment of tuberculosis
	Other ophthalmologicals
	Pregnadien derivatives
	Progestogens
	PROGESTOGENS AND ESTROGENS IN COMBINATION
	Progestogens and estrogens, fixed combinations
	Progestogens and estrogens, sequential preparations
	Sympathomimetics in glaucoma therapy
	Vitamins with minerals
PHENYLEPHRINE	Adrenergic and dopaminergic agents	126286	<.0001	0.155222
	AGENTS FOR TREATMENT OF HEMORRHOIDS AND ANAL FISSURES FOR TOPICAL USE
	Amides
	Aminoalkyl ethers
	Anilides
	Anticholinergics
	Corticosteroids
	Corticosteroids and antiinfectives in combination
	COUGH AND COLD PREPARATIONS
	COUGH SUPPRESSANTS, EXCL. COMBINATIONS WITH EXPECTORANTS
	Diphenylpropylamine derivatives
	Expectorants
	MYDRIATICS AND CYCLOPLEGICS
	NASAL DECONGESTANTS FOR SYSTEMIC USE
	OPHTHALMOLOGICALS
	Opium alkaloids and derivatives
	Opium derivatives and expectorants
	OTHER COLD PREPARATIONS
	Other cough suppressants
	Parasympathomimetics
	Penicillins with extended spectrum
	Phenothiazine derivatives
	Propionic acid derivatives
	Salicylic acid and derivatives
	Substituted alkylamines
	Sympathomimetics
	Sympathomimetics excl. antiglaucoma preparations
	Sympathomimetics used as decongestants
	Sympathomimetics, plain
	Sympathomimetics,combinations excl corticosteroids
	Xanthines
LEVONORGESTREL	Carboxamide derivatives	487736	<.0001	0.152498
	Combinations of sulfonamides and trimethoprim, incl. derivatives
	CONTRACEPTIVES FOR TOPICAL USE
	Drugs used in nicotine dependence
	Emergency contraceptives
	Estren derivatives
	Estrogens
	HORMONAL CONTRACEPTIVES FOR SYSTEMIC USE
	Intrauterine contraceptives
	Natural and semisynthetic estrogens, plain
	Other antidepressants
	Other antihistamines for systemic use
	Other drugs for treatment of tuberculosis
	Other psychostimulants and nootropics
	Pregnadien derivatives
	Progestogens
	PROGESTOGENS AND ESTROGENS IN COMBINATION
	Progestogens and estrogens, fixed combinations
	Progestogens and estrogens, sequential preparations
ZINGIBER OFFICINALE	Anilides	352549	<.0001	0.144429
	Antacids with sodium bicarbonate
	Antacids, other combinations
	APPETITE STIMULANTS
	Calcium, combinations with vitamin D and/or other drugs
	DRUGS FOR CONSTIPATION
	Enzyme and acid preparations, combinations
	Enzyme preparations
	Multivitamins with minerals
	Other antiinflammatory and antirheumatic agents, non-steroids
	Other antiinflammatory/antirheumatic agents in combination with other drugs
	Other combinations of nutrients
	OTHER DERMATOLOGICAL PREPARATIONS
	Other drugs for constipation
	Other lipid modifying agents
	OTHER NUTRIENTS
	Other therapeutic products
	Other throat preparations
	UNSPECIFIED HERBAL
	Vitamins, other combinations
DROSPIRENONE	Folic acid and derivatives	199675	<.0001	0.137396
	Progestogens
	Progestogens and estrogens, fixed combinations
ZIDOVUDINE	Antivirals for treatment of HIV infections, combinations	89372	0.0003	0.131618
	Benzodiazepine derivatives
	Combinations of antibacterials
	Combinations of sulfonamides and trimethoprim, incl. derivatives
	Nucleoside and nucleotide reverse transcriptase inhibitors
	Nucleosides and nucleotides excl. reverse transcriptase inhibitors
LEFLUNOMIDE	Other antiinflammatory and antirheumatic agents, non-steroids	620003	<.0001	0.119887
	Other immunosuppressants
	Selective immunosuppressants
	SPECIFIC ANTIRHEUMATIC AGENTS
SULFASALAZINE	Aminosalicylic acid and similar agents	474998	<.0001	0.107132
	Other antidepressants
ISOTRETINOIN	Antiinfectives for treatment of acne	137222	<.0001	0.0857023
	HORMONAL CONTRACEPTIVES FOR SYSTEMIC USE
	Other emollients and protectives
	Retinoids for topical use in acne
	Retinoids for treatment of acne
ORLISTAT	Peripherally acting antiobesity products	62107	0.0009	0.063138
ETONOGESTREL	HORMONAL CONTRACEPTIVES FOR SYSTEMIC USE	230707	<.0001	0.0509516
	Intravaginal contraceptives
	Other centrally acting agents
	Progestogens
	Progestogens and estrogens, fixed combinations
PHTHALYLSULFATHIAZOLE	Antibiotics	97530	<.0001	0.0401994
	ANTIDIARRHEALS, INTESTINAL ANTIINFLAMMATORY/ANTIINFECTIVE AGENTS
	Hydroxyquinoline derivatives
	Other antiinfectives and antiseptics
	Other intestinal antiinfectives
	Sulfonamides
DESOXIMETASONE	Corticosteroids, potent (group III)	157983	<.0001	0.0248097
	Corticosteroids, potent, combinations with antibiotics
	Corticosteroids, potent, other combinations
	Other antifungals for topical use
	Salicylic acid preparations
ADAPALENE	Antiinfectives for treatment of acne	408868	<.0001	0.00957461
	Retinoids for topical use in acne
